# Supplementary material for: Amorphization and defect engineering in constructing ternary composite Ag/PW10V2/am-TiO2−x for enhanced photocatalytic nitrogen fixation
Source: Royal Society of Chemistry journal article supplement (doi:10.1039/d1nj05917c), 2021-12-16
Supplement: d1nj05917c1.pdf [file d1nj05917c1.pdf]

## Supplementary Information

# **Amorphization and Defect Engineering in Constructing Ternary Composite Ag/PW<sub>10</sub>V<sub>2</sub>/am-TiO<sub>2-x</sub> for Enhanced Photocatalytic Nitrogen Fixation**

Caiting Feng,<sup>a</sup> Panfeng Wu,<sup>b</sup> Qinlong Li,<sup>a</sup> Jiquan Liu,<sup>\*a</sup> Danjun Wang,<sup>c</sup> Bin Liu,<sup>a</sup> Tianyu Wang,<sup>a</sup>  
Huaiming Hu,<sup>a</sup> and Ganglin Xue<sup>\*a</sup>

*<sup>a</sup>. Key Laboratory of Synthetic and Natural Functional Molecule Chemistry, College of Chemistry & Materials Science, Northwest University, Xi'an, 710127, P. R. China*

*E-mail: jiquan-liu@nwu.edu.cn, xglin707@163.com*

*<sup>b</sup>. School of Chemistry and Chemical Engineering, Xi'an Shiyou University, Xi'an, 710065, P. R. China*

*<sup>c</sup>. Shaanxi Key Laboratory of Chemical Reaction Engineering, College of Chemistry & Chemical Engineering, Yan'an University, Yan'an, 716000, P. R. China*

## Table of contents

|                                                                                                                                                                                                                                                                                                                                                                                                            |          |
|------------------------------------------------------------------------------------------------------------------------------------------------------------------------------------------------------------------------------------------------------------------------------------------------------------------------------------------------------------------------------------------------------------|----------|
| <b>1. Experimental section.....</b>                                                                                                                                                                                                                                                                                                                                                                        | <b>6</b> |
| NH <sub>3</sub> /NH <sub>4</sub> <sup>+</sup> concentration determination and <sup>15</sup> N <sub>2</sub> isotope labeling experiment.....                                                                                                                                                                                                                                                                | 6        |
| Photocatalytic degradation of methyl orange (MO) under simulated sunlight.....                                                                                                                                                                                                                                                                                                                             | 6        |
| <b>2. Supplementary Scheme, Figures, Tables and Discussion.....</b>                                                                                                                                                                                                                                                                                                                                        | <b>7</b> |
| Table S1. Ti, W, and Ag weight fractions (in wt%) in PW <sub>10</sub> V <sub>2</sub> /am-TiO <sub>2-x-z</sub> and Ag/PW <sub>10</sub> V <sub>2</sub> /am-TiO <sub>2-x-y</sub> composites (z% is the theoretic PW <sub>10</sub> V <sub>2</sub> fraction in wt%, y% is the theoretic Ag fraction in wt%).....                                                                                                | 7        |
| Fig. S1. SEM images of (a) am-TiO <sub>2-x</sub> , (b) PW <sub>10</sub> V <sub>2</sub> /am-TiO <sub>2-x</sub> , (c) Ag/am-TiO <sub>2-x</sub> and (d) Ag/PW <sub>10</sub> V <sub>2</sub> /am-TiO <sub>2-x</sub> .....                                                                                                                                                                                       | 8        |
| Fig. S2. (a) EDX-mapping, (b) EDX spectrum and (c) ICP-AES for Ag/PW <sub>10</sub> V <sub>2</sub> /am-TiO <sub>2-x</sub> composite.....                                                                                                                                                                                                                                                                    | 9        |
| Fig. S3. TEM images of the as-synthesized ternary composites Ag/PW <sub>10</sub> V <sub>2</sub> /am-TiO <sub>2-x-y</sub> (a) y = 0.5, (b) y = 1.0, (c) y = 1.5 and (d) y = 2.0 (y% is the theoretic Ag fraction in wt%).....                                                                                                                                                                               | 10       |
| Fig. S4. N <sub>2</sub> -absorption-desorption isotherms and BJH pore size distribution curves for (a, b) am-TiO <sub>2-x</sub> , PW <sub>10</sub> V <sub>2</sub> /am-TiO <sub>2-x</sub> , Ag/am-TiO <sub>2-x</sub> and Ag/PW <sub>10</sub> V <sub>2</sub> /am-TiO <sub>2-x</sub> , as well as (c, d) Ag/PW <sub>10</sub> V <sub>2</sub> /am-TiO <sub>2-x</sub> composites with different Ag loadings..... | 11       |
| Table S2. Textural parameters of as-synthesized catalysts.....                                                                                                                                                                                                                                                                                                                                             | 11       |
| Fig. S5. PXRD of (a) am-TiO <sub>2-x</sub> , PW <sub>10</sub> V <sub>2</sub> /am-TiO <sub>2-x</sub> , Ag/am-TiO <sub>2-x</sub> and Ag/PW <sub>10</sub> V <sub>2</sub> /am-TiO <sub>2-x</sub> , as well as (b) Ag/PW <sub>10</sub> V <sub>2</sub> /am-TiO <sub>2-x</sub> composites with different Ag loadings.....                                                                                         | 13       |
| Fig. S6. (a) XPS survey spectra of different catalysts, and high-resolution spectra for (b, d) W4f, (c, f) Ag3d and (e) Ti3p.....                                                                                                                                                                                                                                                                          | 14       |

|                                                                                                                                                                                                                                                                                                                                                                                                                                                                                                                              |    |
|------------------------------------------------------------------------------------------------------------------------------------------------------------------------------------------------------------------------------------------------------------------------------------------------------------------------------------------------------------------------------------------------------------------------------------------------------------------------------------------------------------------------------|----|
| Fig. S7. FT-IR spectra of (a) am-TiO <sub>2-x</sub> , PW <sub>10</sub> V <sub>2</sub> /am-TiO <sub>2-x</sub> , Ag/am-TiO <sub>2-x</sub> and Ag/PW <sub>10</sub> V <sub>2</sub> /am-TiO <sub>2-x</sub> , as well as (b) Ag/PW <sub>10</sub> V <sub>2</sub> /am-TiO <sub>2-x</sub> catalysts with different Ag loadings.                                                                                                                                                                                                       | 16 |
| Fig. S8. Calibration curve for NH <sub>4</sub> Cl standard solution using Nessler's reagent as color developer in spectrophotometry.....                                                                                                                                                                                                                                                                                                                                                                                     | 17 |
| Fig. S9. Absorbance of reaction medium using Nessler's reagent as color developer to determine NH <sub>3</sub> /NH <sub>4</sub> <sup>+</sup> in spectrophotometry.....                                                                                                                                                                                                                                                                                                                                                       | 17 |
| Fig. S10. (a) Ion-chromatography for generated NH <sub>3</sub> /NH <sub>4</sub> <sup>+</sup> over Ag/PW <sub>10</sub> V <sub>2</sub> /am-TiO <sub>2-x</sub> using N <sub>2</sub> and water as feedstocks, (b) Calibration curve for NH <sub>4</sub> Cl standard solution using ion-chromatography and (c) The comparison of NH <sub>3</sub> /NH <sub>4</sub> <sup>+</sup> productions over Ag/PW <sub>10</sub> V <sub>2</sub> /am-TiO <sub>2-x</sub> determined by ion chromatography and Nessler's colorimetric method..... | 18 |
| Fig. S11. NH <sub>3</sub> /NH <sub>4</sub> <sup>+</sup> productions under simulated sunlight irradiation in nitrogen atmosphere over (a) PW <sub>10</sub> V <sub>2</sub> /am-TiO <sub>2-x-z</sub> and (b) Ag/PW <sub>10</sub> V <sub>2</sub> /am-TiO <sub>2-x-y</sub> , respectively. (z% is the theoretic PW <sub>10</sub> V <sub>2</sub> fraction in wt%, y% is the theoretic Ag fraction in wt%).....                                                                                                                     | 19 |
| Table S3. The reported results for photo-driven nitrogen reduction reaction using water and pure nitrogen as feedstocks without introducing scavenger.....                                                                                                                                                                                                                                                                                                                                                                   | 20 |
| Fig. S12. (a) SEM images, (b) TEM images, (c) XPS spectra, (d) FT-IR spectra, (e) PXRD patterns as well as (f) Ti, W and Ag fractions of Ag/PW <sub>10</sub> V <sub>2</sub> /am-TiO <sub>2-x</sub> before and after photo-driven nitrogen reduction reaction under simulated sunlight irradiation.....                                                                                                                                                                                                                       | 21 |
| Fig. S13. EPR spectra of PW <sub>10</sub> V <sub>2</sub> and PW <sub>12</sub> .....                                                                                                                                                                                                                                                                                                                                                                                                                                          | 22 |
| Fig. S14. Normalized (a) EPR intensity, (b) N <sub>2</sub> chemisorption amount and (c) NH <sub>3</sub> /NH <sub>4</sub> <sup>+</sup> productions for am-TiO <sub>2-x</sub> based catalysts.....                                                                                                                                                                                                                                                                                                                             | 23 |

|                                                                                                                                                                                                                                                                                                                                                                                                                             |    |
|-----------------------------------------------------------------------------------------------------------------------------------------------------------------------------------------------------------------------------------------------------------------------------------------------------------------------------------------------------------------------------------------------------------------------------|----|
| Fig. S15. (a) PXRD patterns, (b) EPR spectra, (c) N <sub>2</sub> -TPD profiles, (d) N <sub>2</sub> -absorption-desorption isotherms, (e) BJH pore size distributions and (f) NH <sub>3</sub> /NH <sub>4</sub> <sup>+</sup> productions over am-TiO <sub>2-x</sub> , TiO <sub>2-x</sub> -A200°C and TiO <sub>2-x</sub> -A250°C, as well as (g) the summary of concerned parameters.....                                      | 24 |
| Fig. S16. Normalized (a) EPR intensity, (b) N <sub>2</sub> chemisorption amount and (c) NH <sub>3</sub> /NH <sub>4</sub> <sup>+</sup> productions for am-TiO <sub>2-x</sub> , TiO <sub>2-x</sub> -A200°C and TiO <sub>2-x</sub> -A250°C.....                                                                                                                                                                                | 24 |
| Fig. S17. (a) XRD patterns, (b) EPR spectra, (c) N <sub>2</sub> -TPD profiles, (d) N <sub>2</sub> -absorption-desorption isotherms, (e) BJH pore size distributions, (f) NH <sub>3</sub> /NH <sub>4</sub> <sup>+</sup> productions for am-TiO <sub>2-x</sub> , TiO <sub>2-x</sub> -180°C, TiO <sub>2-x</sub> -200°C and TiO <sub>2-x</sub> -220°C, as well as (g) the summary of concerned parameters.....                  | 26 |
| Fig. S18. Normalized (a) EPR intensity, (b) N <sub>2</sub> chemisorption amount and (c) NH <sub>3</sub> /NH <sub>4</sub> <sup>+</sup> productions for am-TiO <sub>2-x</sub> , TiO <sub>2-x</sub> -180°C, TiO <sub>2-x</sub> -200°C and TiO <sub>2-x</sub> -220°C.....                                                                                                                                                       | 26 |
| Fig. S19. (a) XRD patterns, (b) EPR spectra, (c) N <sub>2</sub> -TPD profiles, (d) N <sub>2</sub> -absorption-desorption isotherms, (e) BJH pore size distributions, (f) NH <sub>3</sub> /NH <sub>4</sub> <sup>+</sup> productions for Ag/PW <sub>10</sub> V <sub>2</sub> /am-TiO <sub>2-x</sub> and Ag/PW <sub>10</sub> V <sub>2</sub> /TiO <sub>2-x</sub> -220°C, as well as (g) the summary of concerned parameters..... | 28 |
| Fig. S20. Normalized (a) EPR intensity, (b) N <sub>2</sub> chemisorption amount and (c) NH <sub>3</sub> /NH <sub>4</sub> <sup>+</sup> productions for Ag/PW <sub>10</sub> V <sub>2</sub> /am-TiO <sub>2-x</sub> and Ag/PW <sub>10</sub> V <sub>2</sub> /TiO <sub>2-x</sub> -220°C.....                                                                                                                                      | 28 |
| Fig. S21. (a) Tauc plots of am-TiO <sub>2-x</sub> and PW <sub>10</sub> V <sub>2</sub> , (b, d) Mott-Schottky plots of am-TiO <sub>2-x</sub> and PW <sub>10</sub> V <sub>2</sub> , (c) Urbach plot of am-TiO <sub>2-x</sub> , as well as (e) cyclic voltammogram of PW <sub>10</sub> V <sub>2</sub> .....                                                                                                                    | 30 |
| Fig. S22. DMPO spin-trapping EPR spectra in (a) aqueous dispersion and (b) methanol dispersion without irritation.....                                                                                                                                                                                                                                                                                                      | 31 |
| Fig. S23. (a) Schematic diagram of the EPR hyperfine splitting for DMPO-·OH and DMPO-·O <sub>2</sub> <sup>-</sup> adducts, as well as (b) corresponding g-factors, A <sub>N</sub> (G) and A <sub>Hβ</sub> (G) values.....                                                                                                                                                                                                   | 31 |
| Scheme S1. Two different types of charge carrier separation and migration mechanism of the Ag/PW <sub>10</sub> V <sub>2</sub> /am-TiO <sub>2-x</sub> heterojunctions.....                                                                                                                                                                                                                                                   | 32 |

|                                                                                                                                                                                                                                                                             |           |
|-----------------------------------------------------------------------------------------------------------------------------------------------------------------------------------------------------------------------------------------------------------------------------|-----------|
| Fig. S24. (a) The photocatalytic activities of as-prepared catalysts for MO degradation under simulated sunlight and (b) corresponding trapping experiments for active species.....                                                                                         | 33        |
| Table S4. Decay time of am-TiO <sub>2-x</sub> , PW <sub>10</sub> V <sub>2</sub> , PW <sub>10</sub> V <sub>2</sub> /am-TiO <sub>2-x</sub> , Ag/am-TiO <sub>2-x</sub> and Ag/PW <sub>10</sub> V <sub>2</sub> /am-TiO <sub>2-x</sub> derived from time-resolved PL curves..... | 35        |
| Table S5. Transient photocurrent intensity of PW <sub>10</sub> V <sub>2</sub> , am-TiO <sub>2-x</sub> , PW <sub>10</sub> V <sub>2</sub> /am-TiO <sub>2-x</sub> , Ag/am-TiO <sub>2-x</sub> and Ag/PW <sub>10</sub> V <sub>2</sub> /am-TiO <sub>2-x</sub> .....               | 35        |
| Table S6. The resistance of am-TiO <sub>2-x</sub> , PW <sub>10</sub> V <sub>2</sub> , PW <sub>10</sub> V <sub>2</sub> /am-TiO <sub>2-x</sub> , Ag/am-TiO <sub>2-x</sub> and Ag/PW <sub>10</sub> V <sub>2</sub> /am-TiO <sub>2-x</sub> obtained by EIS Nyquist plots.....    | 36        |
| <b>3. References.....</b>                                                                                                                                                                                                                                                   | <b>37</b> |

## 1. Experimental section

### **NH<sub>3</sub>/NH<sub>4</sub><sup>+</sup> concentration determination and <sup>15</sup>N<sub>2</sub> isotope labeling experiment**

NH<sub>3</sub>/NH<sub>4</sub><sup>+</sup> concentration was determined by the spectrophotometry method using Nessler's reagent as color developer.<sup>1</sup> First, clear reaction solution (2.5 mL) and deionized water (2.5 mL) was transferred to a 25 mL colorimetric tube, followed by adding potassium sodium tartrate solution (0.1 mL, 0.5 g mL<sup>-1</sup>) and Nessler's reagent (0.1 mL). Then, the mixture was allowed to stand for 10 min at room temperature. Afterwards, the absorbance of the solution was recorded on SP-756P UV-visible spectrophotometer. The concentration of NH<sub>3</sub>/NH<sub>4</sub><sup>+</sup> was calculated according to the absorbance at  $\lambda = 420$  nm, where calibration curve (Fig. S8) was obtained using NH<sub>4</sub>Cl standard solutions with concentration of 0.0, 1.0, 2.0, 3.0, 4.0, 5.0 mg L<sup>-1</sup>.

### **Photocatalytic degradation of methyl orange (MO) under simulated sunlight**

The photocatalytic activity of as-prepared catalysts was investigated through degradation of MO under simulated sunlight, using a 500 W xenon lamp as illuminant at a constant temperature (25°C). Typically, 40 mg catalyst was added into 30 mL MO aqueous solution (10 mg L<sup>-1</sup>, pH = 2). Before irradiation, the mixture solution was continuously stirred in darkness for 30 min to achieve the equilibrium of adsorption-desorption between the photocatalyst and pollutant. During irradiation (without filter, 320 nm <  $\lambda$  < 800 nm), a certain amount of the suspension was withdrawn at 15 min interval. After centrifugation, the absorbance of supernatant at 507 nm was recorded.

## 2. Supplementary Scheme, Figures, Tables and Discussion

**Table S1.** Ti, W, and Ag weight fractions (in wt%) in  $\text{PW}_{10}\text{V}_2/\text{am-TiO}_{2-x-z}$  and  $\text{Ag}/\text{PW}_{10}\text{V}_2/\text{am-TiO}_{2-x-y}$  composites ( $z\%$  is the theoretic  $\text{PW}_{10}\text{V}_2$  fraction in wt%,  $y\%$  is the theoretic Ag fraction in wt%)

| Composites                                                   | Ti/wt%<br>(theoretic value) | W/wt%<br>(theoretic value) | Ag/wt%<br>(theoretic value) |
|--------------------------------------------------------------|-----------------------------|----------------------------|-----------------------------|
| $\text{PW}_{10}\text{V}_2/\text{am-TiO}_{2-x-9.8}$           | 55.1(54.0)                  | 6.5 (6.9)                  | –                           |
| $\text{PW}_{10}\text{V}_2/\text{am-TiO}_{2-x-14.5}$          | 52.0(51.2)                  | 9.7(10.4)                  | –                           |
| $\text{PW}_{10}\text{V}_2/\text{am-TiO}_{2-x-19.5}$          | 48.5(48.1)                  | 13.0(13.7)                 | –                           |
| $\text{Ag}/\text{PW}_{10}\text{V}_2/\text{am-TiO}_{2-x-0.5}$ | 50.8(50.9)                  | 11.1(10.3)                 | 0.6(0.5)                    |
| $\text{Ag}/\text{PW}_{10}\text{V}_2/\text{am-TiO}_{2-x-1.0}$ | 48.4(50.6)                  | 11.2(10.3)                 | 0.9(1.0)                    |
| $\text{Ag}/\text{PW}_{10}\text{V}_2/\text{am-TiO}_{2-x-1.5}$ | 47.6(50.4)                  | 10.8(10.2)                 | 1.4(1.5)                    |
| $\text{Ag}/\text{PW}_{10}\text{V}_2/\text{am-TiO}_{2-x-2.0}$ | 49.2(50.1)                  | 10.1(10.2)                 | 2.1(2.0)                    |

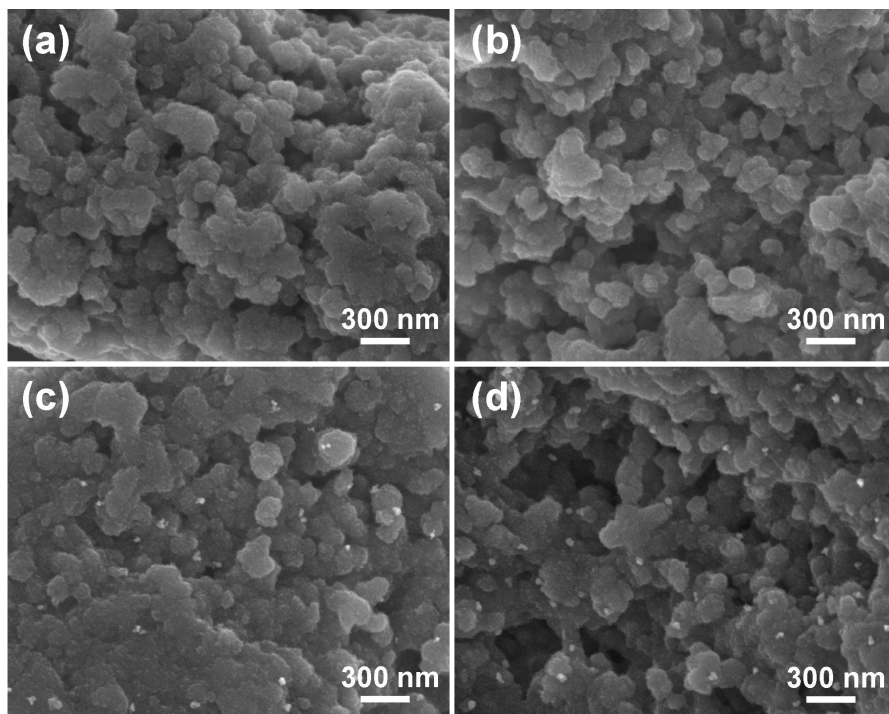

**Fig. S1.** SEM images of (a) am-TiO<sub>2-x</sub>, (b) PW<sub>10</sub>V<sub>2</sub>/am-TiO<sub>2-x</sub>, (c) Ag/am-TiO<sub>2-x</sub> and (d) Ag/PW<sub>10</sub>V<sub>2</sub>/am-TiO<sub>2-x</sub>

The morphologies of am-TiO<sub>2-x</sub>, PW<sub>10</sub>V<sub>2</sub>/am-TiO<sub>2-x</sub>, Ag/am-TiO<sub>2-x</sub> and Ag/PW<sub>10</sub>V<sub>2</sub>/am-TiO<sub>2-x</sub> are displayed in Fig. S1. All of them exhibit mainly a three-dimensional worm-like interconnected meso-structure packed by fine nanoscale particles (ca.120 nm) with uniform distribution.



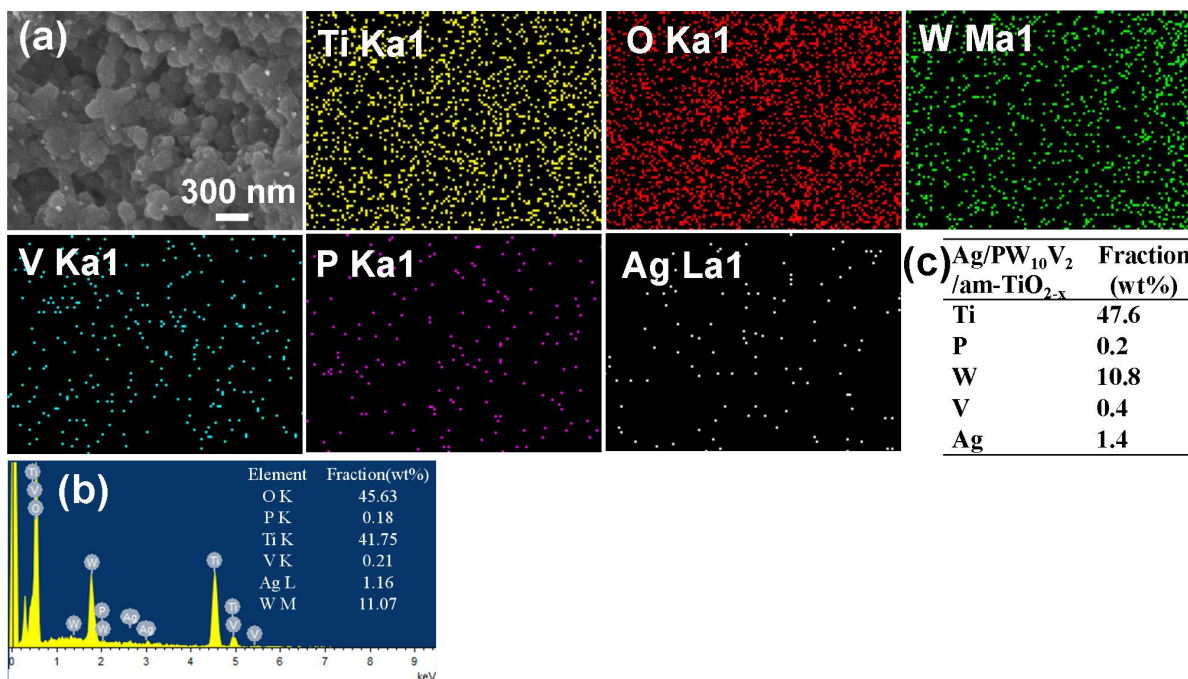

**Fig. S2.** (a) EDX-mapping, (b) EDX spectrum and (c) ICP-AES for Ag/PW<sub>10</sub>V<sub>2</sub>/am-TiO<sub>2-x</sub> composite

The successful synthesis of Ag/PW<sub>10</sub>V<sub>2</sub>/am-TiO<sub>2-x</sub> is confirmed by EDX, EDX-mapping, ICP-MS experiments, where elements Ti, P, W, V, O and Ag co-exist in the ternary composite (Fig. S2). Both EDX and ICP-AES outcomes agree with each other very well, demonstrate the loadings of PW<sub>10</sub>V<sub>2</sub> and Ag NPs on am-TiO<sub>2-x</sub> fit the theoretic values (Table S1).

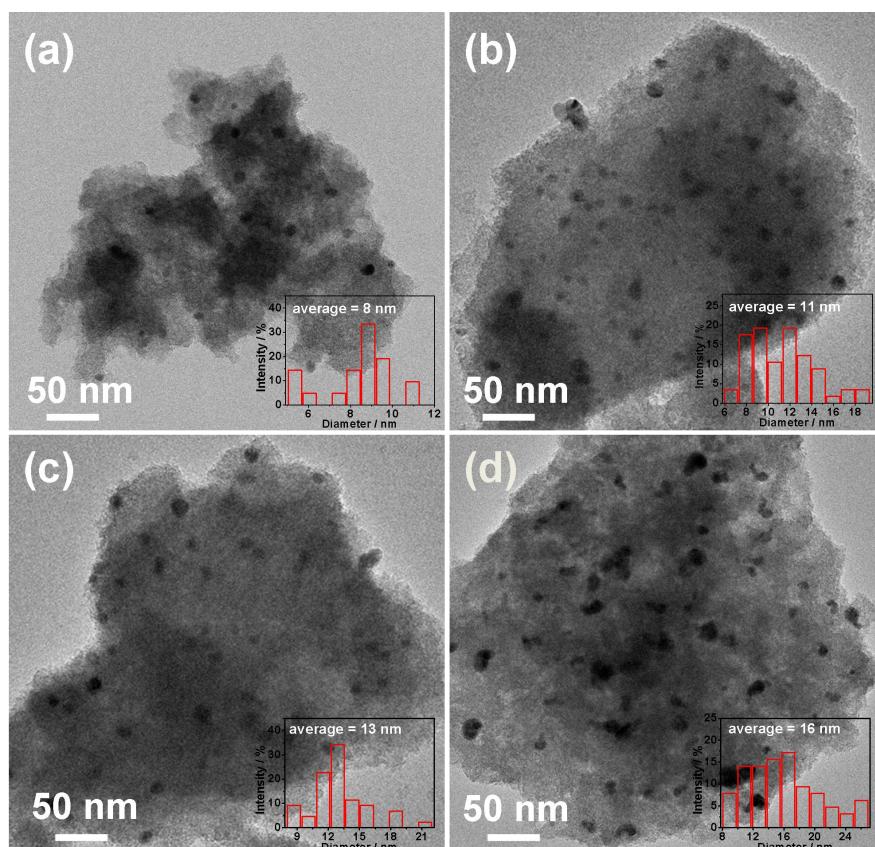

**Fig. S3.** TEM images of the as-synthesized ternary composites Ag/PW<sub>10</sub>V<sub>2</sub>/am-TiO<sub>2-x-y</sub> (a)  $y = 0.5$ , (b)  $y = 1.0$ , (c)  $y = 1.5$  and (d)  $y = 2.0$  ( $y\%$  is the theoretic Ag fraction in wt%)

TEM images of Ag/PW<sub>10</sub>V<sub>2</sub>/am-TiO<sub>2-x-y</sub> ( $y = 0.5, 1.0, 1.5, 2.0$ ) are displayed in Fig. S3, together with the size distribution of Ag NPs (inserts). The average particle size of Ag NPs increases with the Ag loading, and aggregation of Ag NPs becomes severe when the loading increases to 2.0%.

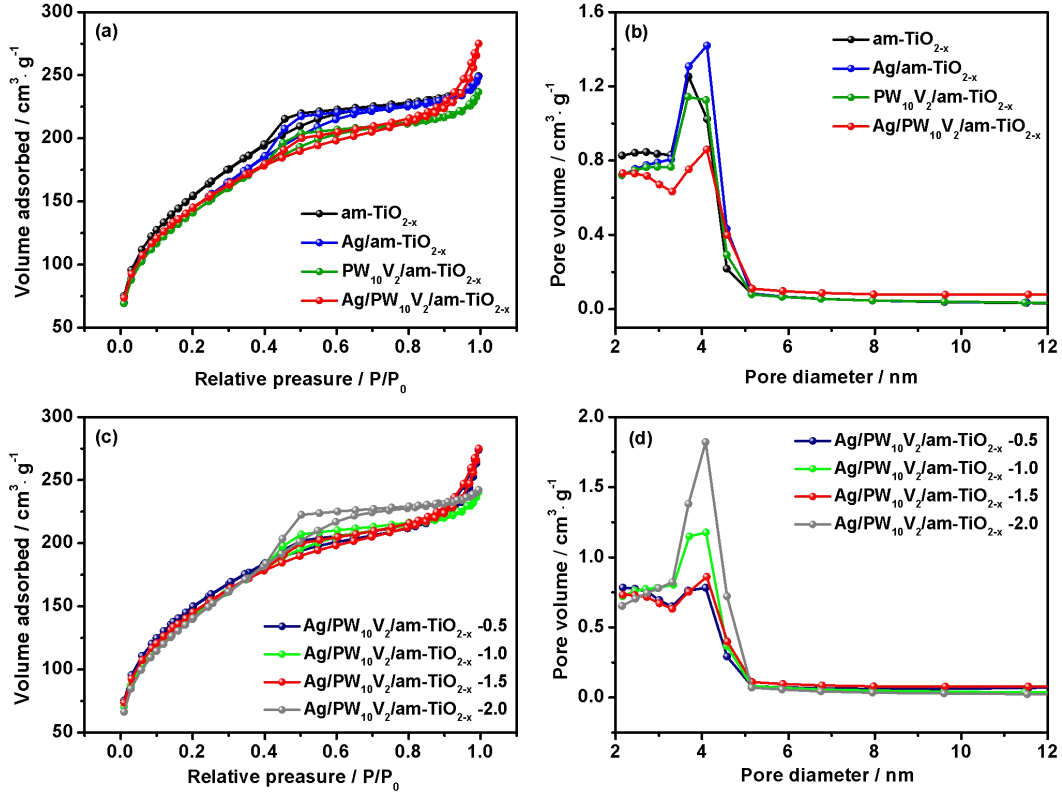

**Fig. S4.** N<sub>2</sub>-adsorption-desorption isotherms and BJH pore size distribution curves for (a, b) am-TiO<sub>2-x</sub>, PW<sub>10</sub>V<sub>2</sub>/am-TiO<sub>2-x</sub>, Ag/am-TiO<sub>2-x</sub> and Ag/PW<sub>10</sub>V<sub>2</sub>/am-TiO<sub>2-x</sub>, as well as (c, d) Ag/PW<sub>10</sub>V<sub>2</sub>/am-TiO<sub>2-x</sub> composites with different Ag loadings

**Table S2.** Textural parameters of as-synthesized catalysts

| Samples                                                        | BET surface area (m <sup>2</sup> g <sup>-1</sup> ) | Pore size (nm) | Pore volume (cm <sup>3</sup> g <sup>-1</sup> ) |
|----------------------------------------------------------------|----------------------------------------------------|----------------|------------------------------------------------|
| am-TiO <sub>2-x</sub>                                          | 555.29                                             | 3.68           | 0.37                                           |
| Ag/am-TiO <sub>2-x</sub>                                       | 524.32                                             | 4.08           | 0.39                                           |
| PW <sub>10</sub> V <sub>2</sub> /am-TiO <sub>2-x</sub>         | 508.13                                             | 3.85           | 0.35                                           |
| Ag/PW <sub>10</sub> V <sub>2</sub> /am-TiO <sub>2-x</sub> -1.5 | 513.38                                             | 4.11           | 0.38                                           |
| Ag/PW <sub>10</sub> V <sub>2</sub> /am-TiO <sub>2-x</sub> -0.5 | 528.88                                             | 4.08           | 0.37                                           |
| Ag/PW <sub>10</sub> V <sub>2</sub> /am-TiO <sub>2-x</sub> -1.0 | 512.87                                             | 4.08           | 0.35                                           |
| Ag/PW <sub>10</sub> V <sub>2</sub> /am-TiO <sub>2-x</sub> -2.0 | 512.52                                             | 4.06           | 0.36                                           |

The texture of heterogeneous catalyst greatly affects its catalytic performance with respect to the number of active sites and the accessibility of active sites to the substrate. Herein, nitrogen adsorption-desorption isotherms are shown in Figs. S4a and 4b for am-TiO<sub>2-x</sub>, Ag/am-TiO<sub>2-x</sub>, PW<sub>10</sub>V<sub>2</sub>/am-TiO<sub>2-x</sub> and Ag/PW<sub>10</sub>V<sub>2</sub>/am-TiO<sub>2-x</sub>. Type IV isotherms together with type H2 hysteresis loops indicate the presence of mesopores, whose average diameters are determined to be 3-5 nm according to by BJH pore size distribution curves (Fig. S4b). As listed in Table S2, the BET surface areas of am-TiO<sub>2-x</sub>, Ag/am-TiO<sub>2-x</sub>, PW<sub>10</sub>V<sub>2</sub>/am-TiO<sub>2-x</sub> and Ag/PW<sub>10</sub>V<sub>2</sub>/am-TiO<sub>2-x</sub> are measured to be 555, 508, 524 and 513 m<sup>2</sup> g<sup>-1</sup>, respectively. Such high specific surface area is beneficial to the adsorption of nitrogen molecules, and their mesoporous feature facilitates mass transfer in the heterogeneous catalytic process. The presence of Ag NPs and PW<sub>10</sub>V<sub>2</sub> on the inner surface of am-TiO<sub>2-x</sub> may results in reduced BET surface area for PW<sub>10</sub>V<sub>2</sub> and/or Ag NPs doped composites. In the ternary composites, the texture features do not vary significant, when different amounts of Ag NPs are loaded. This might hint that suitable decorating fraction would not cause the blockage or collapse of am-TiO<sub>2-x</sub> matrix. Of course, high loading of Ag leads to the aggregation of Ag NPs as revealed by TEM (Fig. S3).

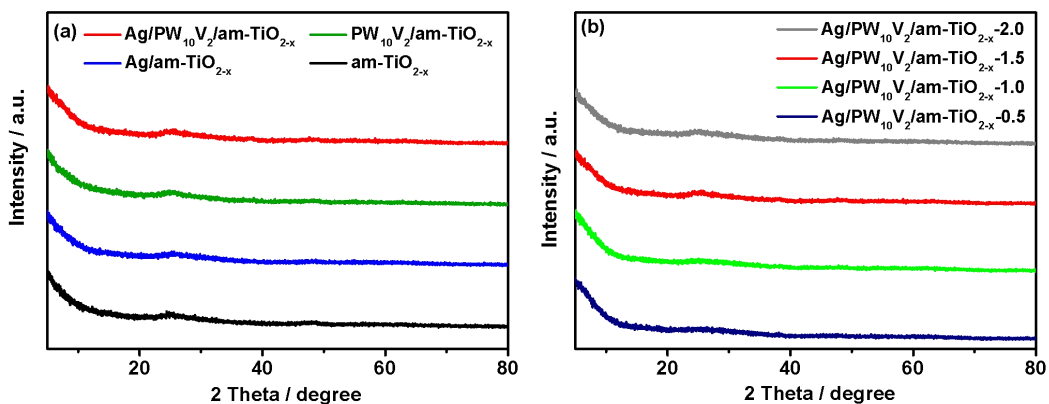

**Fig. S5.** PXRD of (a) am-TiO<sub>2-x</sub>, PW<sub>10</sub>V<sub>2</sub>/am-TiO<sub>2-x</sub>, Ag/am-TiO<sub>2-x</sub> and Ag/PW<sub>10</sub>V<sub>2</sub>/am-TiO<sub>2-x</sub>, as well as (b) Ag/PW<sub>10</sub>V<sub>2</sub>/am-TiO<sub>2-x</sub> composites with different Ag loadings

Fig. S5a shows the PXRD patterns for am-TiO<sub>2-x</sub>, PW<sub>10</sub>V<sub>2</sub>/am-TiO<sub>2-x</sub>, Ag/am-TiO<sub>2-x</sub> and Ag/PW<sub>10</sub>V<sub>2</sub>/am-TiO<sub>2-x</sub>. The amorphous nature of am-TiO<sub>2-x</sub> is confirmed due to the absence of characteristic diffractions for rutile or anatase phase. It might relate to abundant OV<sub>s</sub> in its matrix, which is thought to be favorable for adsorption and activation of substrates in the photo-driven process.<sup>2</sup> Then, the high dispersion of polyoxometalate is confirmed owing to the fact that no diffractions present in the composites. Similarly, fine dispersion of Ag NPs over Ag/PW<sub>10</sub>V<sub>2</sub>/am-TiO<sub>2-x</sub> composites with different Ag loadings is obtained (Fig. S5b), which is in well agreement with TEM observations (Fig. 1 and Fig. S3).

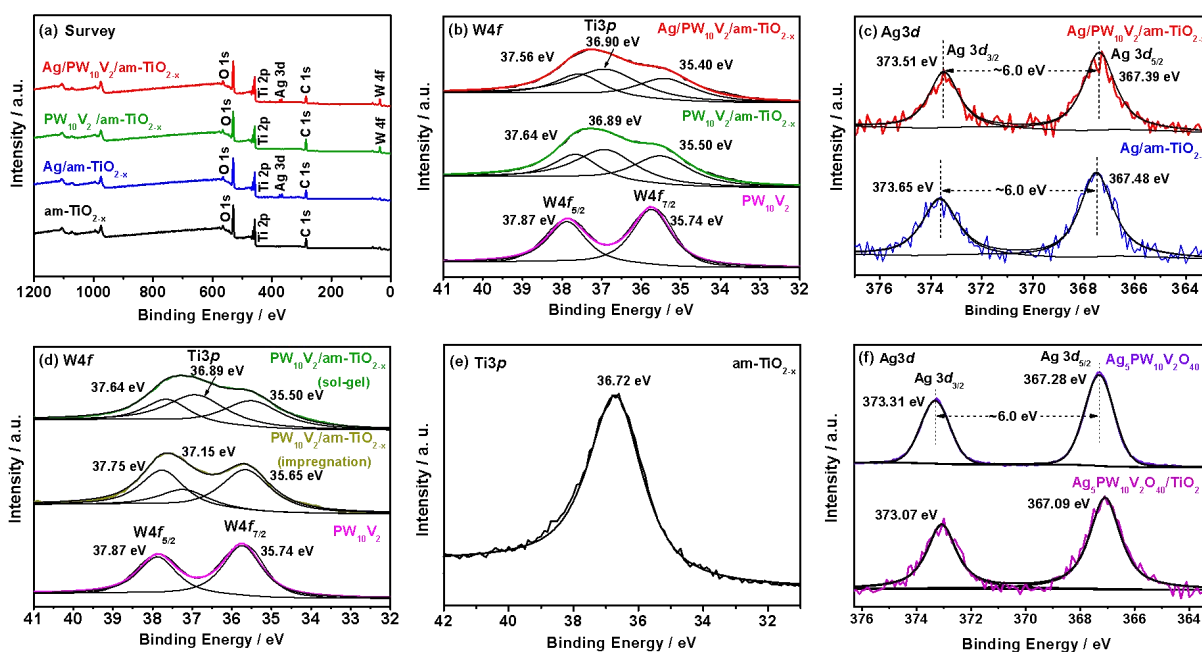

**Fig. S6.** (a) XPS survey spectra of different catalysts, and high-resolution spectra for (b, d) W4f, (c, f) Ag3d and (e) Ti3p

In the XPS survey spectrum of Ag/PW<sub>10</sub>V<sub>2</sub>/am-TiO<sub>2-x</sub> (Fig. S6a), Ag, W, Ti and O co-exist in the composite, and similar observations are found over binary composites (Ag/am-TiO<sub>2-x</sub> and PW<sub>10</sub>V<sub>2</sub>/am-TiO<sub>2-x</sub>). The high-resolution spectra for W4f are displayed in Figs. S6b and S6d. The broad line can be deconvoluted into two sub-peaks, the binding energy of ca.37.8 and 35.7 eV are ascribed to W4f<sub>5/2</sub> and W4f<sub>7/2</sub> for PW<sub>10</sub>V<sub>2</sub>, respectively. After immobilizing PW<sub>10</sub>V<sub>2</sub> on am-TiO<sub>2-x</sub>, puny negative shifts are observed for W4f signals. This is an indication of strong interaction between PW<sub>10</sub>V<sub>2</sub> and am-TiO<sub>2-x</sub>. It agrees well with the positive shift of Ti2p signals (Fig. 3a in main text). With respect to the composites, three sub-peaks are obtained after deconvolution, and the emerged peak at ca. 36.9 eV is attributed to the Ti3p. This is further confirmed by control experiment, where binding energy of 36.72 eV is observed in the case of am-TiO<sub>2-x</sub> (Fig. S6e). Moreover, the binding energies of 373.6 and 367.4 eV are ascribed to Ag3d<sub>3/2</sub> and Ag3d<sub>5/2</sub>, respectively, for composites with Ag NPs decoration (Fig. S6c).

Here, ca. 6.0 eV interval between  $\text{Ag}3d_{3/2}$  and  $\text{Ag}3d_{5/2}$  peaks is an indication of metallic feature of Ag NPs.

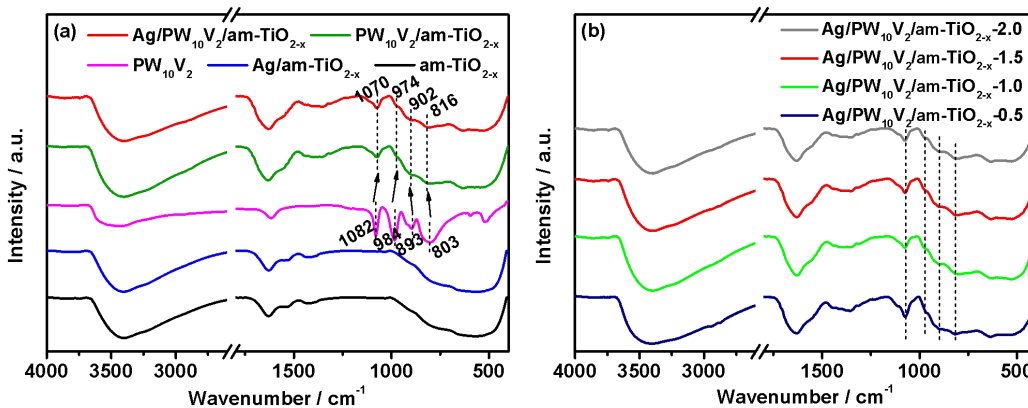

**Fig. S7.** FT-IR spectra of (a) am-TiO<sub>2-x</sub>, PW<sub>10</sub>V<sub>2</sub>/am-TiO<sub>2-x</sub>, Ag/am-TiO<sub>2-x</sub> and Ag/PW<sub>10</sub>V<sub>2</sub>/am-TiO<sub>2-x</sub>, as well as (b) Ag/PW<sub>10</sub>V<sub>2</sub>/am-TiO<sub>2-x</sub> catalysts with different Ag loadings

Structural integrity of the Keggin unit in the Ag/PW<sub>10</sub>V<sub>2</sub>/am-TiO<sub>2-x</sub> composite is confirmed by FT-IR (Fig. S7). For PW<sub>10</sub>V<sub>2</sub> (Fig. S7a), the vibration modes relating to the Keggin unit emerge at 1082 (P-O<sub>a</sub>), 984 cm<sup>-1</sup> (W=O<sub>d</sub>), 893 (W-O<sub>c</sub>-W), and 803 cm<sup>-1</sup> (W-O<sub>b</sub>-W).<sup>3</sup> After forming PW<sub>10</sub>V<sub>2</sub>/am-TiO<sub>2-x</sub> and Ag/PW<sub>10</sub>V<sub>2</sub>/am-TiO<sub>2-x</sub> composites, the corresponding vibration frequencies shift to 1070, 974, 902 and 816 cm<sup>-1</sup>, respectively. The result implies that the primary Keggin structure stays intact when introducing to am-TiO<sub>2-x</sub> framework by current synthetic route. Compared to parent PW<sub>10</sub>V<sub>2</sub>, these shifts of frequencies are due to strong interactions between the Keggin unit and am-TiO<sub>2-x</sub>. According to the previous report,<sup>4</sup> Keggin units are supposed to be anchored on TiO<sub>2</sub> via W-O-Ti covalent bonds, hydrogen bonds and acid-base interactions between Keggin anion and ≡Ti-OH groups on the surface of TiO<sub>2</sub>. This guarantees the intactness of Ag/PW<sub>10</sub>V<sub>2</sub>/am-TiO<sub>2-x</sub> against the liberation of PW<sub>10</sub>V<sub>2</sub> from am-TiO<sub>2-x</sub> matrix during the preparation process and subsequent catalytic experiments.



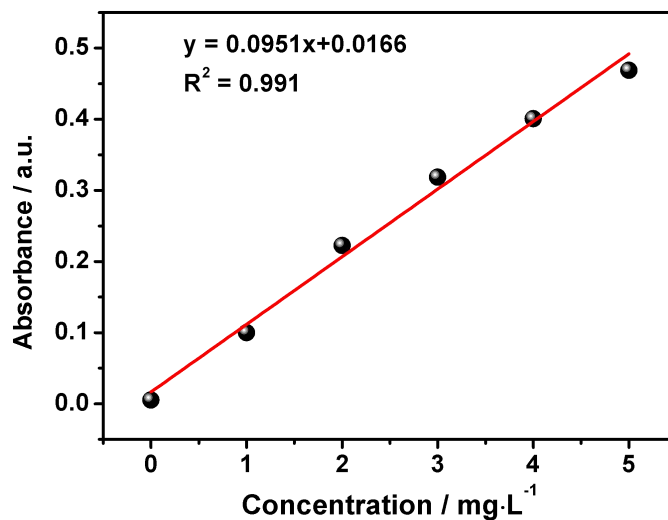

**Fig. S8.** Calibration curve for  $\text{NH}_4\text{Cl}$  standard solution using Nessler's reagent as color developer in spectrophotometry

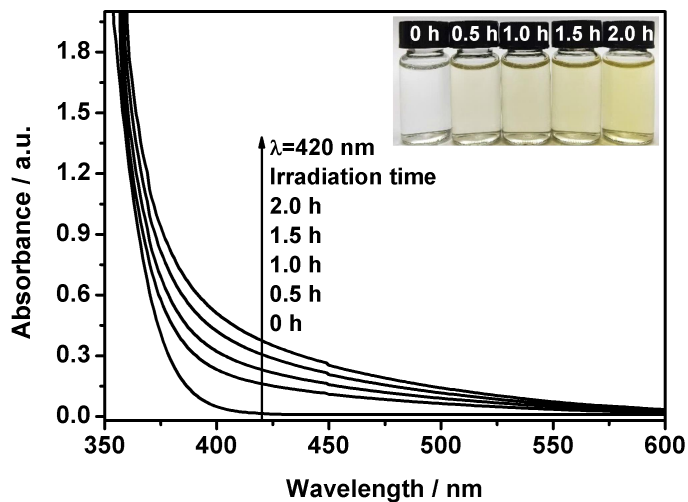

**Fig. S9.** Absorbance of reaction medium using Nessler's reagent as color developer to determine  $\text{NH}_3/\text{NH}_4^+$  in spectrophotometry

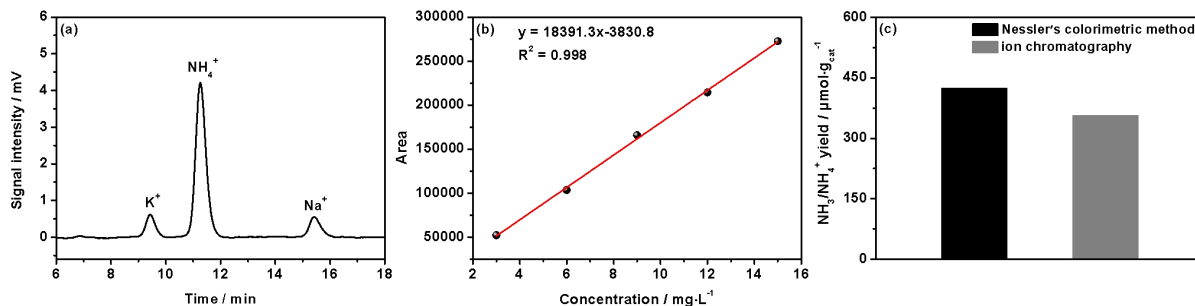

**Fig. S10.** (a) Ion-chromatography for generated NH<sub>3</sub>/NH<sub>4</sub><sup>+</sup> over Ag/PW<sub>10</sub>V<sub>2</sub>/am-TiO<sub>2-x</sub> using N<sub>2</sub> and water as feedstocks, (b) Calibration curve for NH<sub>4</sub>Cl standard solution using ion-chromatography and (c) The comparison of NH<sub>3</sub>/NH<sub>4</sub><sup>+</sup> productions over Ag/PW<sub>10</sub>V<sub>2</sub>/am-TiO<sub>2-x</sub> determined by ion chromatography and Nessler's colorimetric method

Photo-driven nitrogen reduction is carried out under N<sub>2</sub> atmosphere, and the concentration of generated NH<sub>3</sub>/NH<sub>4</sub><sup>+</sup> is measured by ion chromatography. As shown in Fig. S10a, the retention time for NH<sub>4</sub><sup>+</sup> locates at 11.3 min. The NH<sub>4</sub><sup>+</sup> yield is determined to be 356.7 μmol g<sub>cat</sub><sup>-1</sup>, which is consistent with the experimental results obtained by the Nessler's colorimetric method (Fig. S10c).

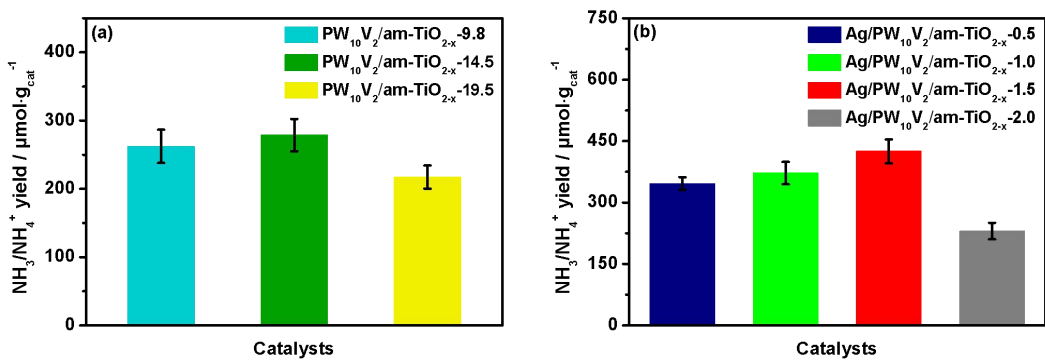

**Fig. S11.**  $\text{NH}_3/\text{NH}_4^+$  productions under simulated sunlight irradiation in nitrogen atmosphere over (a)  $\text{PW}_{10}\text{V}_2/\text{am-TiO}_{2-x-z}$  and (b)  $\text{Ag}/\text{PW}_{10}\text{V}_2/\text{am-TiO}_{2-x-y}$ , respectively. (z% is the theoretic  $\text{PW}_{10}\text{V}_2$  fraction in wt%, y% is the theoretic Ag fraction in wt%)

The loading effects of  $\text{PW}_{10}\text{V}_2$  and Ag NPs are investigated. The  $\text{PW}_{10}\text{V}_2$  loading is optimized to be 14.5wt% in  $\text{PW}_{10}\text{V}_2/\text{am-TiO}_{2-x}$  composites. Then, 1.5wt% of Ag NPs in  $\text{Ag}/\text{PW}_{10}\text{V}_2/\text{am-TiO}_{2-x}$  is beneficial to photo-driven nitrogen reduction reaction (Fig. S11). It is plausible that less catalytic sites are available for nitrogen activation when excess  $\text{PW}_{10}\text{V}_2$  units or Ag NPs are introduced to  $\text{am-TiO}_{2-x}$ .

**Table S3.** The reported results for photo-driven nitrogen reduction reaction using water and pure nitrogen as feedstocks without introducing scavenger

| Catalysts                                                   | Scavenger                                              | Light source                       | NH <sub>3</sub> /NH <sub>4</sub> <sup>+</sup> production rate / $\mu\text{mol g}_{\text{cat}}^{-1} \text{h}^{-1}$ | Ref.                |
|-------------------------------------------------------------|--------------------------------------------------------|------------------------------------|-------------------------------------------------------------------------------------------------------------------|---------------------|
| CuCr-LDH                                                    | No                                                     | visible light                      | 57.2 <sup>a</sup>                                                                                                 | 5                   |
| MoS <sub>2</sub>                                            | No                                                     | 500 W Xe lamp                      | 325 (pH=3.5)                                                                                                      | 6                   |
| HWO/C500                                                    | No                                                     | simulated sunlight                 | 205                                                                                                               | 7                   |
| Bi <sub>5</sub> O <sub>7</sub> Br-40                        | No                                                     | visible light                      | 1272 <sup>b</sup>                                                                                                 | 8                   |
| Bi <sub>5</sub> O <sub>7</sub> Br-NT                        | No                                                     | visible light                      | 1380                                                                                                              | 9                   |
| Fe-3D graphene                                              | No                                                     | 500 W Hg lamp                      | 22.7 <sup>c</sup>                                                                                                 | 10                  |
| SiW <sub>12</sub> /K-C <sub>3</sub> N <sub>4</sub>          | No                                                     | Xe lamp (100 mW cm <sup>-2</sup> ) | 70.6 <sup>d</sup>                                                                                                 | 11                  |
| Mo-doped W <sub>18</sub> O <sub>49</sub>                    | Na <sub>2</sub> SO <sub>3</sub> aqueous solution, 1 mM | 300 W Xe lamp                      | 195.5                                                                                                             | 12                  |
| Bi <sub>2</sub> MoO <sub>6</sub> /OV-BiOBr                  | No                                                     | 300 W Xe lamp                      | 90.7                                                                                                              | 13                  |
| Bi <sub>4</sub> O <sub>5</sub> Br <sub>2</sub> /ZIF-8       | No                                                     | simulated sunlight                 | 16.4 <sup>e</sup>                                                                                                 | 14                  |
| AgCl/ $\delta$ -Bi <sub>2</sub> O <sub>3</sub>              | No                                                     | visible light                      | 606                                                                                                               | 15                  |
| TiO <sub>2</sub> nanotubes                                  | methanol                                               | simulated sunlight                 | 106.6                                                                                                             | 16                  |
| MoO <sub>3-x</sub>                                          | No                                                     | 300 W Xe lamp                      | 1.11 <sup>f</sup>                                                                                                 | 17                  |
| H-Bi <sub>2</sub> MoO <sub>6</sub>                          | No                                                     | simulated sunlight                 | 1300                                                                                                              | 18                  |
| BiOBr-001-OV                                                | No                                                     | visible light                      | 104.2                                                                                                             | 19                  |
| Ni <sub>2</sub> P/Cd <sub>0.5</sub> Zn <sub>0.5</sub> S     | No                                                     | visible light                      | 253.7 <sup>g</sup>                                                                                                | 20                  |
| Ag- $\delta$ -Bi <sub>2</sub> O <sub>3</sub>                | No                                                     | visible light                      | 1.7 <sup>h</sup>                                                                                                  | 21                  |
| <b>am-TiO<sub>2-x</sub></b>                                 | No                                                     | <b>simulate sunlight</b>           | <b>142.2</b>                                                                                                      | <b>Present work</b> |
| <b>Ag/PW<sub>10</sub>V<sub>2</sub>/am-TiO<sub>2-x</sub></b> | No                                                     | <b>simulate sunlight</b>           | <b>251.2</b>                                                                                                      | <b>Present work</b> |

<sup>a</sup>NH<sub>3</sub>/NH<sub>4</sub><sup>+</sup> production is 142.9  $\mu\text{mol L}^{-1}$ , reaction conditions: 50mg catalyst, 20 mL deionized water, 1h.

<sup>b</sup>NH<sub>3</sub>/NH<sub>4</sub><sup>+</sup> production rate is 12.72 mM  $\text{g}_{\text{cat}}^{-1} \text{h}^{-1}$  in 100 mL reaction medium.

<sup>c</sup>NH<sub>3</sub>/NH<sub>4</sub><sup>+</sup> production rate is 408  $\mu\text{g g}_{\text{cat}}^{-1} \text{h}^{-1}$ .

<sup>d</sup>NH<sub>3</sub>/NH<sub>4</sub><sup>+</sup> production rate is 353.2  $\mu\text{M g}_{\text{cat}}^{-1} \text{h}^{-1}$  in 200 mL reaction medium.

<sup>e</sup>NH<sub>3</sub>/NH<sub>4</sub><sup>+</sup> production rate is 327.338  $\mu\text{mol L}^{-1} \text{h}^{-1} \text{g}_{\text{cat}}^{-1}$  in 50 mL reaction medium.

<sup>f</sup>NH<sub>3</sub>/NH<sub>4</sub><sup>+</sup> production rate is 11.1  $\mu\text{mol L}^{-1} \text{g}_{\text{cat}}^{-1} \text{h}^{-1}$  in 100 mL reaction medium.

<sup>g</sup>NH<sub>3</sub>/NH<sub>4</sub><sup>+</sup> production is 101.5  $\mu\text{mol L}^{-1} \text{h}^{-1}$ , reaction conditions: 0.02 g catalyst, 50 mL deionized water.

<sup>h</sup>NH<sub>3</sub>/NH<sub>4</sub><sup>+</sup> production is 5.1  $\mu\text{mol L}^{-1}$ , reaction conditions: 0.2 g catalyst, 200 mL deionized water, 3h.

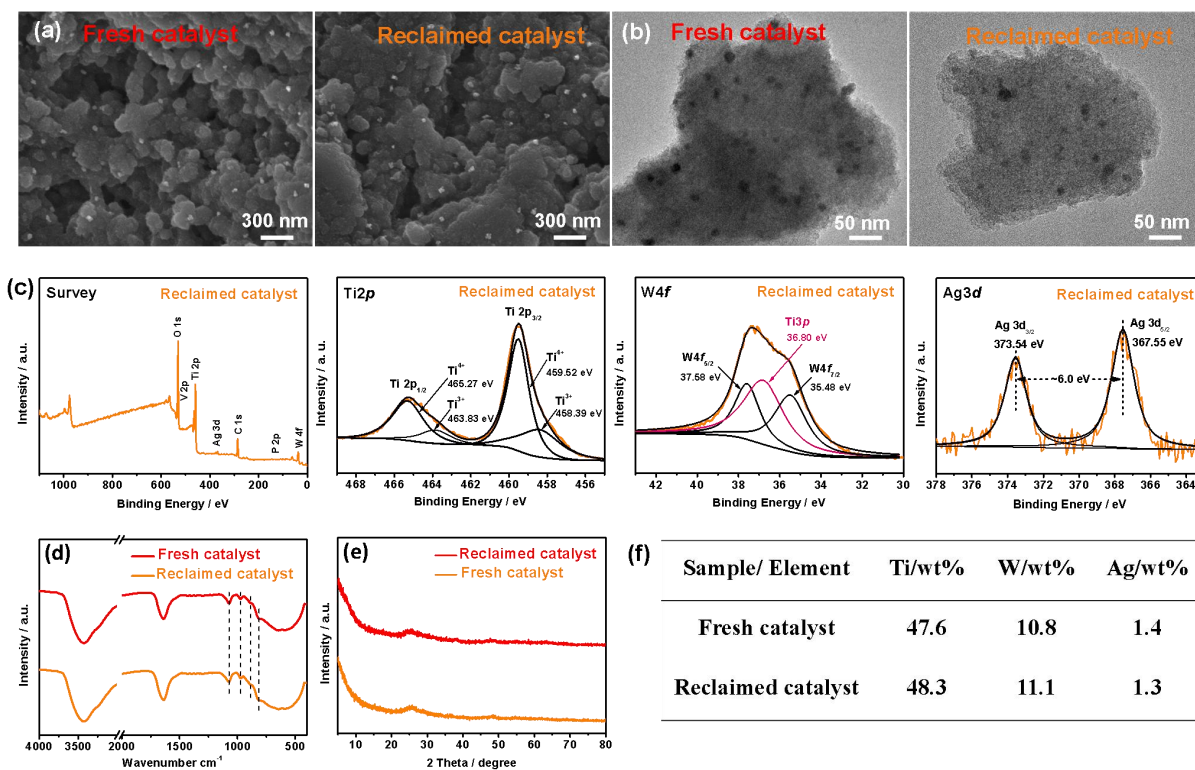

**Fig. S12.** (a) SEM images, (b) TEM images, (c) XPS spectra, (d) FT-IR spectra, (e) PXRD patterns as well as (f) Ti, W and Ag fractions of Ag/PW<sub>10</sub>V<sub>2</sub>/am-TiO<sub>2-x</sub> before and after photo-driven nitrogen reduction reaction under simulated sunlight irradiation

The stability and recyclability of Ag/PW<sub>10</sub>V<sub>2</sub>/am-TiO<sub>2-x</sub> are tested (Fig. 2f in main text). Under simulated sunlight irradiation, negligible activity loss is obtained over Ag/PW<sub>10</sub>V<sub>2</sub>/am-TiO<sub>2-x</sub> after eight cycles in pure nitrogen atmosphere. The texture property and chemical information of the reclaimed catalyst are reflected by SEM, TEM, XPS, FT-IR and XRD (Figs. S12a-e). All these outcomes indicate the intactness of Ag/PW<sub>10</sub>V<sub>2</sub>/am-TiO<sub>2-x</sub> during photo-driven catalytic process. Its excellent stability and recyclability are attributed to the strong interactions between PW<sub>10</sub>V<sub>2</sub> and am-TiO<sub>2-x</sub>, as well between Ag and am-TiO<sub>2-x</sub>. This significantly inhibits the liberation of PW<sub>10</sub>V<sub>2</sub> and Ag from the composite during the catalytic process, as confirmed by ICP-AES (Fig. S12f).

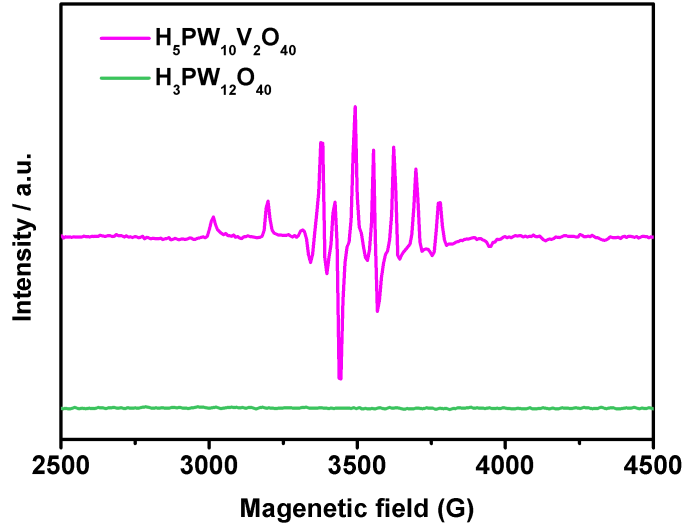

**Fig. S13.** EPR spectra of  $\text{PW}_{10}\text{V}_2$  and  $\text{PW}_{12}$

As shown in Fig. S13, compared to  $\text{H}_3\text{PW}_{12}\text{O}_{40}$  ( $\text{PW}_{12}$ ), EPR signal of  $\text{PW}_{10}\text{V}_2$  is originated from paramagnetic  $\text{O}=\text{V}^{2+}$  centers of  $\text{H}_5\text{V}^{\text{V}}\text{O}_4\text{V}^{\text{IV}}\text{W}_{11}\text{O}_{36}$ , which is a typical impurity in synthesized  $\text{PW}_{10}\text{V}_2$ .<sup>22</sup> For composites, EPR signal for OVs is clearly present in the spectra, whilst these resonances for  $\text{O}=\text{V}^{2+}$  are less visible, mainly due to relative low fraction of  $\text{O}=\text{V}^{2+}$  species. In EPR test, the loadings of parent  $\text{PW}_{10}\text{V}_2$  and  $\text{PW}_{10}\text{V}_2$ -based composites are kept in the same volume. The density of  $\text{PW}_{10}\text{V}_2$  is around four times of  $\text{PW}_{10}\text{V}_2$ -based composites. The ratio of EPR signal intensity for  $\text{O}=\text{V}^{2+}$  species in parent  $\text{PW}_{10}\text{V}_2$  is approximately twice (in volume) but half (in weight) of that for OVs in  $\text{PW}_{10}\text{V}_2$ -based composites. When consideration the fraction of  $\text{PW}_{10}\text{V}_2$  (14.5 wt%) in the composites, the signal intensity of  $\text{O}=\text{V}^{2+}$  species is one fifteenth of that for OVs. Another possibility is that  $\text{H}_5\text{V}^{\text{V}}\text{O}_4\text{V}^{\text{IV}}\text{W}_{11}\text{O}_{36}$  is not well fixed in the am- $\text{TiO}_{2-x}$  matrix, nevertheless, deep mechanism of absence  $\text{O}=\text{V}^{2+}$  signals in the composites will be well illustrated in the future investigations.

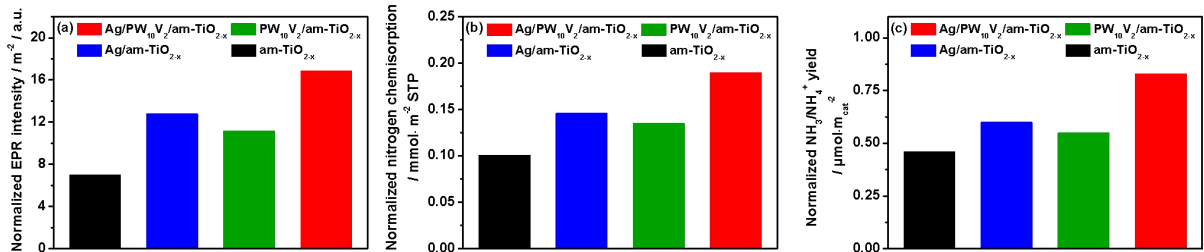

**Fig. S14.** Normalized (a) EPR intensity, (b) N<sub>2</sub> chemisorption amount and (c) NH<sub>3</sub>/NH<sub>4</sub><sup>+</sup> productions for am-TiO<sub>2-x</sub> based catalysts

To well illustrate the structure-reactivity relationship, EPR intensity, nitrogen chemisorption amount and NH<sub>3</sub>/NH<sub>4</sub><sup>+</sup> productions are normalized by BET surface area (Fig. S14). It is obvious that the normalized EPR intensity, nitrogen chemisorption amount increases with the order of am-TiO<sub>2-x</sub>, PW<sub>10</sub>V<sub>2</sub>/am-TiO<sub>2-x</sub>, Ag/am-TiO<sub>2-x</sub> and Ag/PW<sub>10</sub>V<sub>2</sub>/am-TiO<sub>2-x</sub>, together with corresponding catalytic efficiency. This phenomenon strongly demonstrates that OVs play an important role in nitrogen adsorption and activation process.

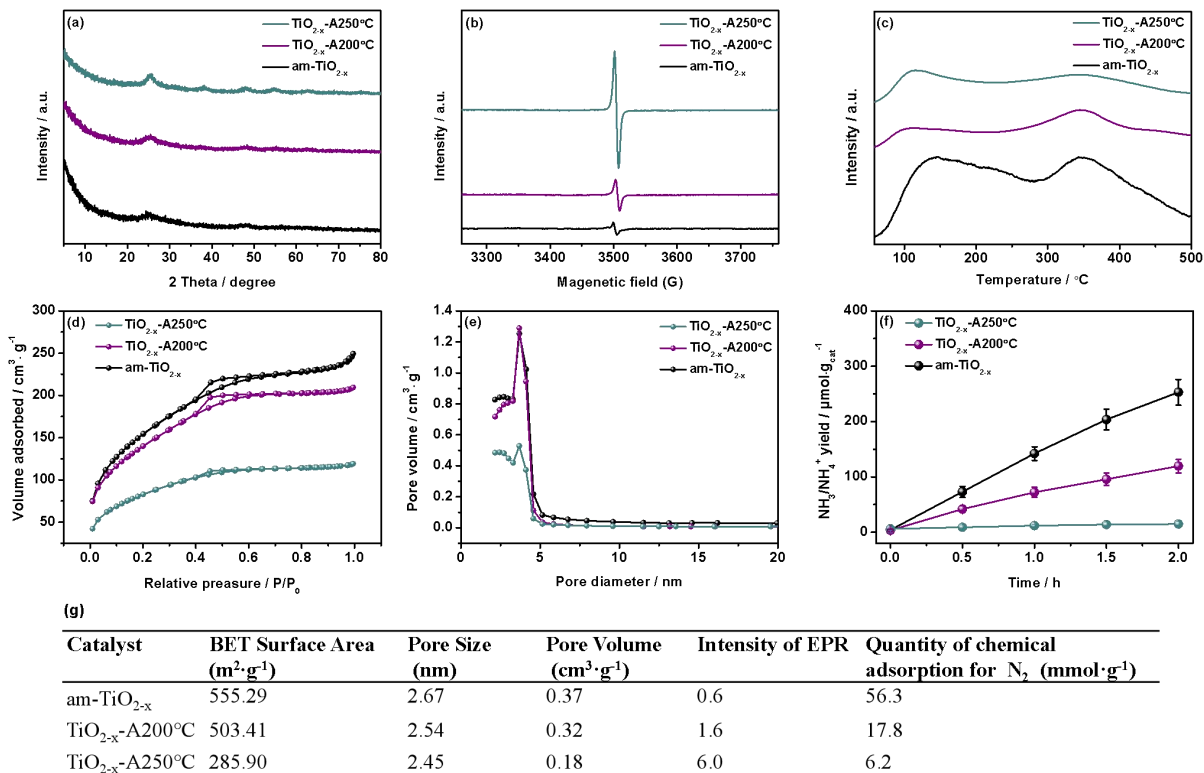

**Fig. S15.** (a) PXRD patterns, (b) EPR spectra, (c) N<sub>2</sub>-TPD profiles, (d) N<sub>2</sub>-absorption-desorption isotherms, (e) BJH pore size distributions and (f) NH<sub>3</sub>/NH<sub>4</sub><sup>+</sup> productions over am-TiO<sub>2-x</sub>, TiO<sub>2-x</sub>-A200°C and TiO<sub>2-x</sub>-A250°C, as well as (g) the summary of concerned parameters

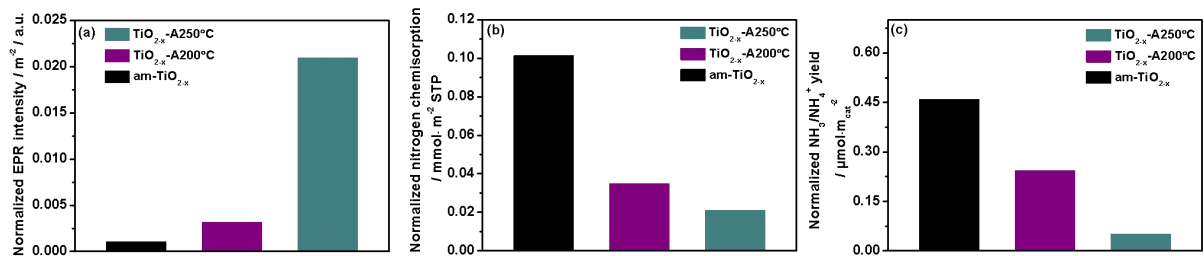

**Fig. S16.** Normalized (a) EPR intensity, (b) N<sub>2</sub> chemisorption amount and (c) NH<sub>3</sub>/NH<sub>4</sub><sup>+</sup> productions for am-TiO<sub>2-x</sub>, TiO<sub>2-x</sub>-A200°C and TiO<sub>2-x</sub>-A250°C

To elucidate the function of OV<sub>s</sub>, as-prepared am-TiO<sub>2-x</sub> is calcinated at 200 and 250°C in air for 2 h, and denoted as TiO<sub>2-x</sub>-A200°C and TiO<sub>2-x</sub>-A250°C, respectively. As shown in Fig. S15, the EPR signal



of  $\text{TiO}_{2-x}$  intensified with increased calcination temperature, as well the slight improved crystallinity. For calcinated  $\text{TiO}_{2-x}$  at higher temperature (200°C or 250°C), the increased OV's are originated from lattice reformation of  $\text{TiO}_{2-x}$  when crystallizing from amorphous phase, in line with reported literature.<sup>23</sup> In the same time, nitrogen chemisorption amount, BET surface area and the  $\text{NH}_3/\text{NH}_4^+$  production of  $\text{TiO}_{2-x}$  decrease along with raised calcination temperature.  $\text{NH}_3/\text{NH}_4^+$  is almost undetectable over  $\text{TiO}_{2-x}$ -A250°C, although it exhibits strong EPR signal intensity. The nitrogen chemisorption amount can be well correlated to activity test. As shown in Fig. S16, it is obvious that the normalized nitrogen chemisorption amount decreases after calcination treatment, together with corresponding catalytic efficiency. This phenomenon strongly demonstrates that surface OV's involve in nitrogen adsorption and activation process, rather than the bulk OV's.

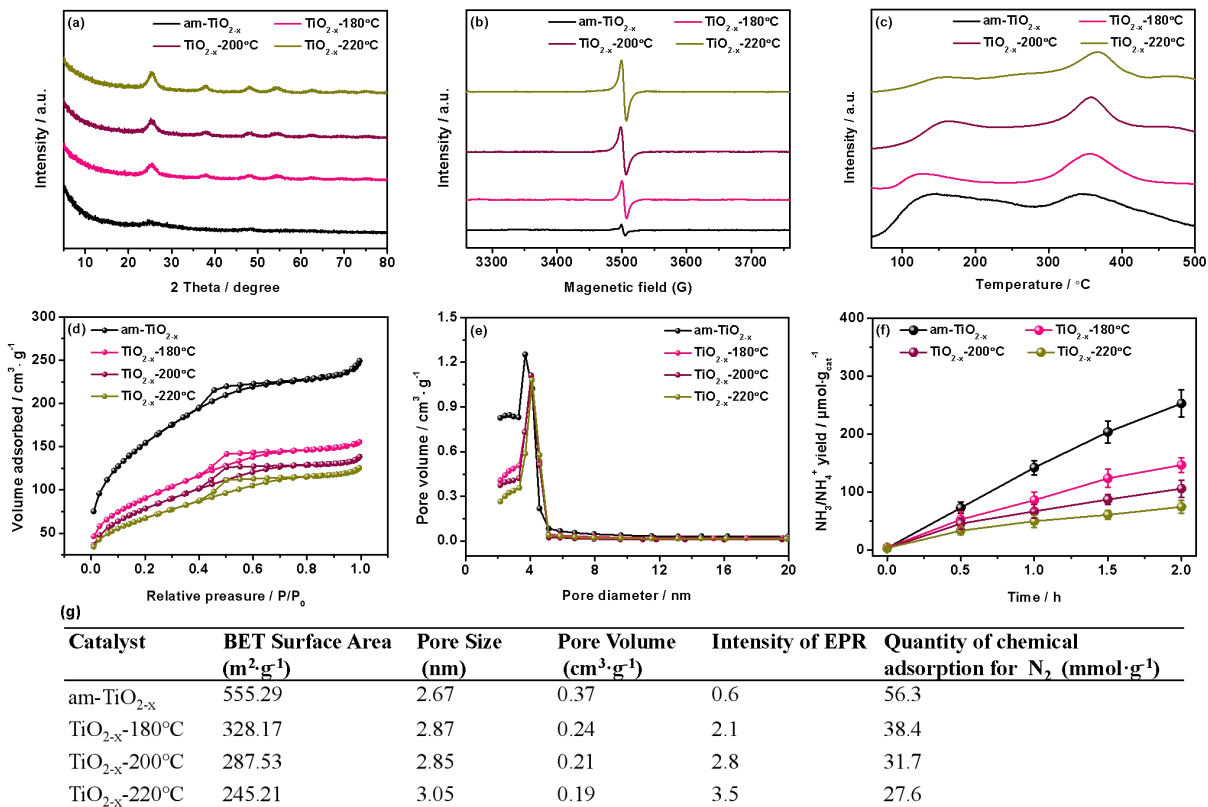

**Fig. S17.** (a) XRD patterns, (b) EPR spectra, (c) N<sub>2</sub>-TPD profiles, (d) N<sub>2</sub>-adsorption-desorption isotherms, (e) BJH pore size distributions, (f) NH<sub>3</sub>/NH<sub>4</sub><sup>+</sup> productions for am-TiO<sub>2-x</sub>, TiO<sub>2-x</sub>-180°C, TiO<sub>2-x</sub>-200°C and TiO<sub>2-x</sub>-220°C, as well as (g) the summary of concerned parameters

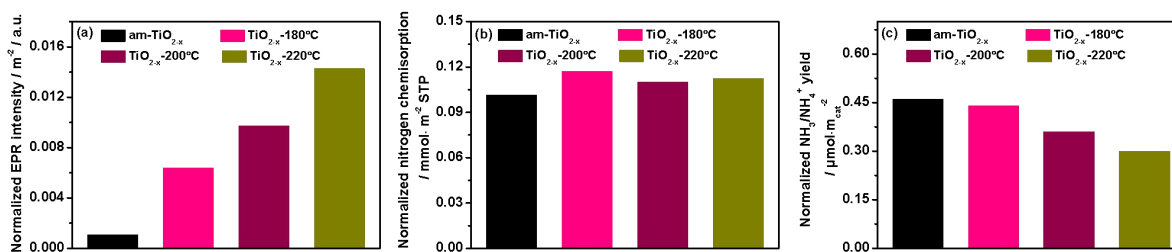

**Fig. S18.** Normalized (a) EPR intensity, (b) N<sub>2</sub> chemisorption amount and (c) NH<sub>3</sub>/NH<sub>4</sub><sup>+</sup> productions for am-TiO<sub>2-x</sub>, TiO<sub>2-x</sub>-180°C, TiO<sub>2-x</sub>-200°C and TiO<sub>2-x</sub>-220°C

TiO<sub>2-x</sub> with crystallinity are prepared in the same way by increasing the temperature of solvothermal synthesis from 180°C to 220°C, and denoted as TiO<sub>2-x</sub>-180°C, TiO<sub>2-x</sub>-200°C and TiO<sub>2-x</sub>-220°C,

respectively. As shown in Fig. S17, the crystallinity of  $\text{TiO}_{2-x}$  becomes higher when raising the solvothermal temperature, as well the strengthened EPR signals for OVs. In the same way, the increased OVs are originated from certain changes on lattice during crystallization process.<sup>23</sup> However, this leads to reduced nitrogen chemisorption, BET surface area, and catalytic performance. As shown in Fig. S18, the normalized EPR signal intensity increases with the solvothermal temperature, while the normalized nitrogen chemisorption amount stays almost constant. This means that the density of bulk OVs increase yet surface OVs at each square meter does not alter. Of course, large surface area is beneficial to nitrogen chemisorption. Then, the normalized  $\text{NH}_3/\text{NH}_4^+$  production over anatase  $\text{TiO}_{2-x}$  reduces, while the crystallinity of  $\text{TiO}_{2-x}$  enhances along with the solvothermal temperature. This outcome highlights the importance of amorphous structure in photo-driven catalytic process.

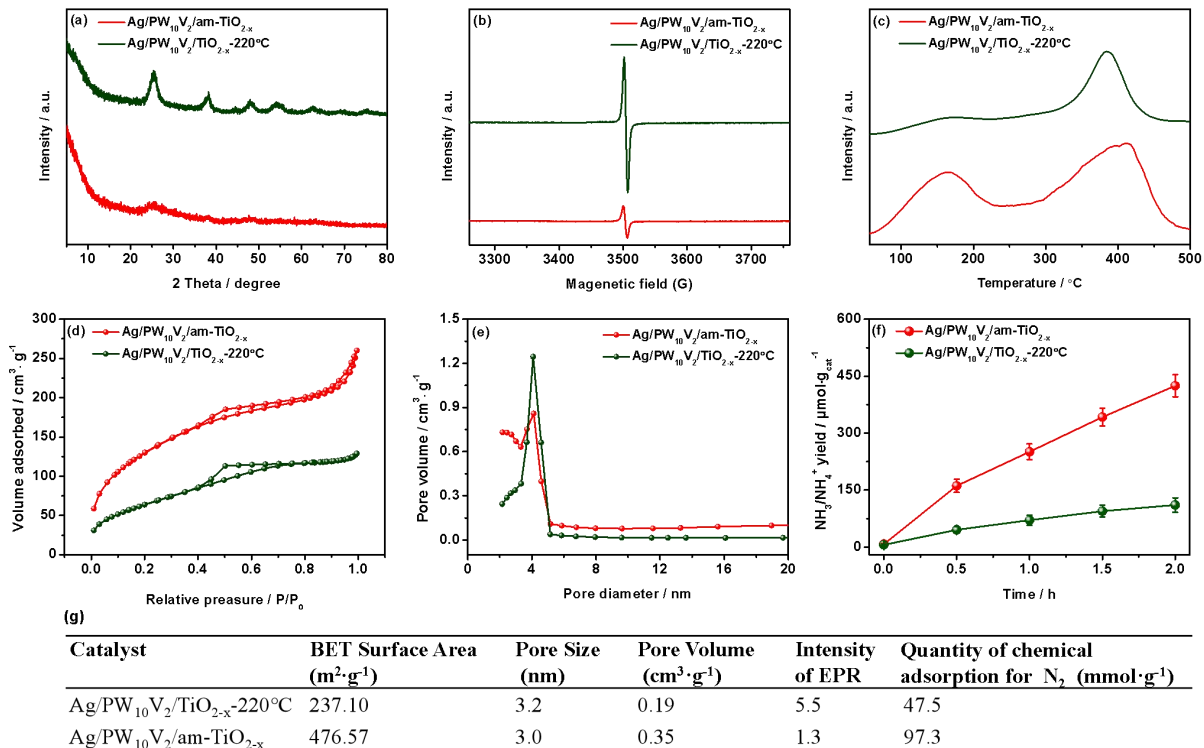

**Fig. S19.** (a) XRD patterns, (b) EPR spectra, (c) N<sub>2</sub>-TPD profiles, (d) N<sub>2</sub>-absorption-desorption isotherms, (e) BJH pore size distributions, (f) NH<sub>3</sub>/NH<sub>4</sub><sup>+</sup> productions for Ag/PW<sub>10</sub>V<sub>2</sub>/am-TiO<sub>2-x</sub> and Ag/PW<sub>10</sub>V<sub>2</sub>/TiO<sub>2-x</sub>-220°C, as well as (g) the summary of concerned parameters

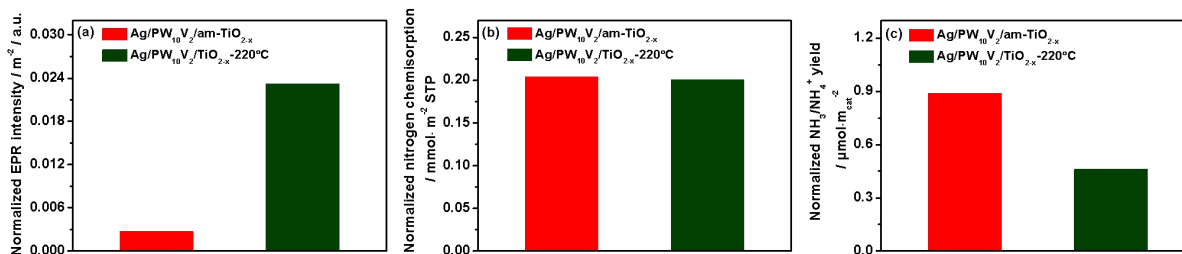

**Fig. S20.** Normalized (a) EPR intensity, (b) N<sub>2</sub> chemisorption amount and (c) NH<sub>3</sub>/NH<sub>4</sub><sup>+</sup> productions for Ag/PW<sub>10</sub>V<sub>2</sub>/am-TiO<sub>2-x</sub> and Ag/PW<sub>10</sub>V<sub>2</sub>/TiO<sub>2-x</sub>-220°C

PW<sub>10</sub>V<sub>2</sub> and Ag NPs co-doped TiO<sub>2-x</sub> (Ag/PW<sub>10</sub>V<sub>2</sub>/TiO<sub>2-x</sub>-220°C) is obtained at solvothermal synthesis of 220°C. As shown in Fig. S19, TiO<sub>2-x</sub> matrix with anatase crystalline is achieved, together with

intensified EPR signal. This is in line with  $\text{TiO}_{2-x}$ -220°C as mentioned above.<sup>23</sup> As expected, nitrogen chemisorption amount decreased, as well BET surface area. Then, 111.2  $\mu\text{mol g}_{\text{cat}}^{-1}$  of  $\text{NH}_3/\text{NH}_4^+$  is generated over  $\text{Ag}/\text{PW}_{10}\text{V}_2/\text{TiO}_{2-x}$ -220°C, which is approximately a quarter of that over  $\text{Ag}/\text{PW}_{10}\text{V}_2/\text{am-TiO}_{2-x}$  (424.9  $\mu\text{mol g}_{\text{cat}}^{-1}$ ). In Fig. S20, both  $\text{Ag}/\text{PW}_{10}\text{V}_2/\text{TiO}_{2-x}$ -220°C and  $\text{Ag}/\text{PW}_{10}\text{V}_2/\text{am-TiO}_{2-x}$  possess similar normalized nitrogen chemisorption amount. However, the normalized  $\text{NH}_3/\text{NH}_4^+$  production over  $\text{Ag}/\text{PW}_{10}\text{V}_2/\text{TiO}_{2-x}$ -220°C is half of that over  $\text{Ag}/\text{PW}_{10}\text{V}_2/\text{am-TiO}_{2-x}$ . The control experiments evidently highlight amorphous nature of  $\text{TiO}_{2-x}$  matrix in  $\text{Ag}/\text{PW}_{10}\text{V}_2/\text{am-TiO}_{2-x}$  during photo-driven nitrogen reduction process.

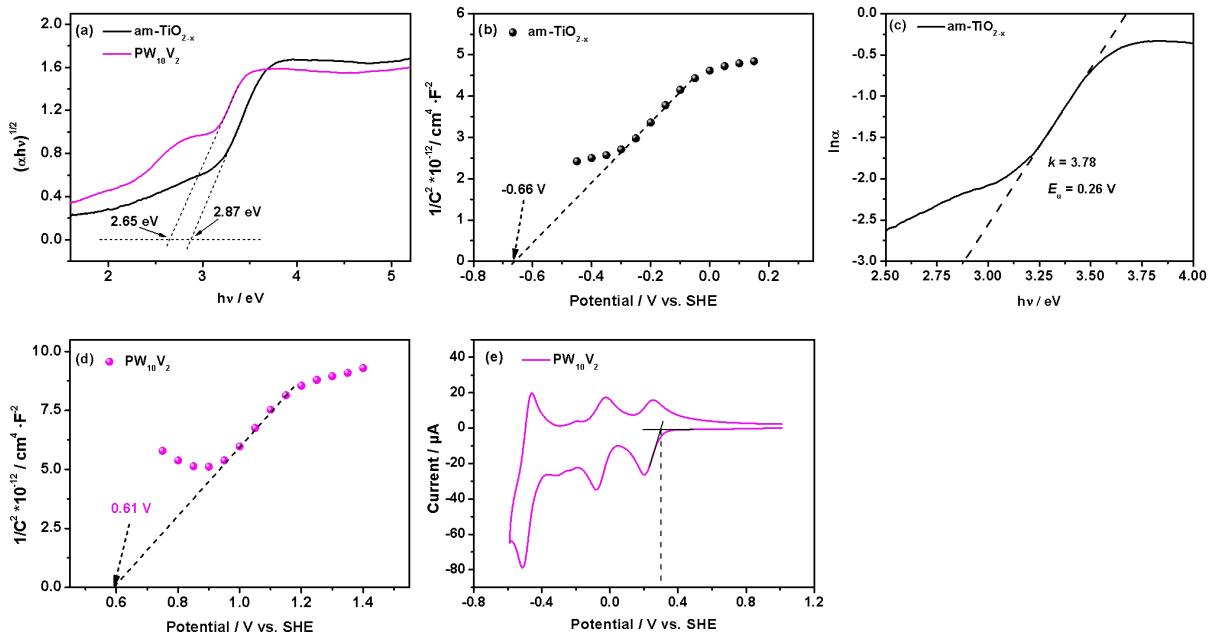

**Fig. S21.** (a) Tauc plots of am-TiO<sub>2-x</sub> and PW<sub>10</sub>V<sub>2</sub>, (b, d) Mott-Schottky plots of am-TiO<sub>2-x</sub> and PW<sub>10</sub>V<sub>2</sub>, (c) Urbach plot of am-TiO<sub>2-x</sub>, as well as (e) cyclic voltammogram of PW<sub>10</sub>V<sub>2</sub>.

As displayed in Fig. S21a, the values of band gap energy ( $E_g$ ) of semiconductors are estimated by the x-axis intercepts of Tauc plots as converted from UV-vis diffuse reflectance spectra. The band gap energy of semiconductor am-TiO<sub>2-x</sub> is determined to be 2.87 eV, as well 2.65 eV for semiconductor-like PW<sub>10</sub>V<sub>2</sub>. Both of them are classified to be *n*-type semiconductors according to their positive slopes in Mott-Schottky plots, and their flat band potentials are estimated to be -0.66 and 0.61 V for am-TiO<sub>2-x</sub> and PW<sub>10</sub>V<sub>2</sub>, respectively. For am-TiO<sub>2-x</sub>, the defect state induced by OVs below CB can be determined by the Urbach plot according to the formula  $\alpha = \alpha_0 \exp(h\nu/E_u)$ .<sup>24</sup> Here,  $\alpha$  is the absorption coefficient,  $\alpha_0$  is a constant,  $h\nu$  is the incident photon energy and  $E_u$  is the Urbach energy (*i.e.* energy level difference from the defect state to CBM). Then,  $\ln\alpha$  is plotted against  $h\nu$  (Fig. S21c), and  $E_u$  is the reciprocal of the slope. Accordingly,  $E_u$  is estimated to be 0.26 eV for am-TiO<sub>2-x</sub>, namely, defect state is 0.26 eV below CBM. With respect to PW<sub>10</sub>V<sub>2</sub>, its LUMO level (0.30 V vs SHE) is estimated by onset potential for the first reduction peak in cyclic voltammogram.<sup>25</sup>

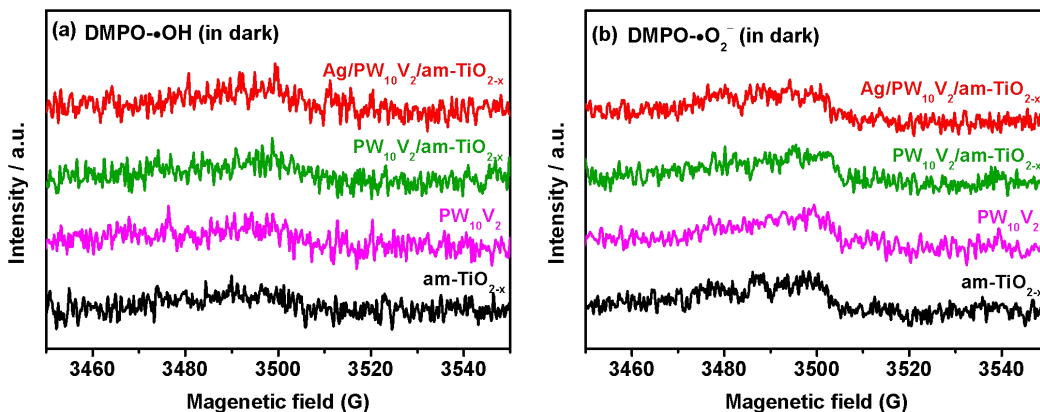

**Fig. S22.** DMPO spin-trapping EPR spectra in (a) aqueous dispersion and (b) methanol dispersion without irritation

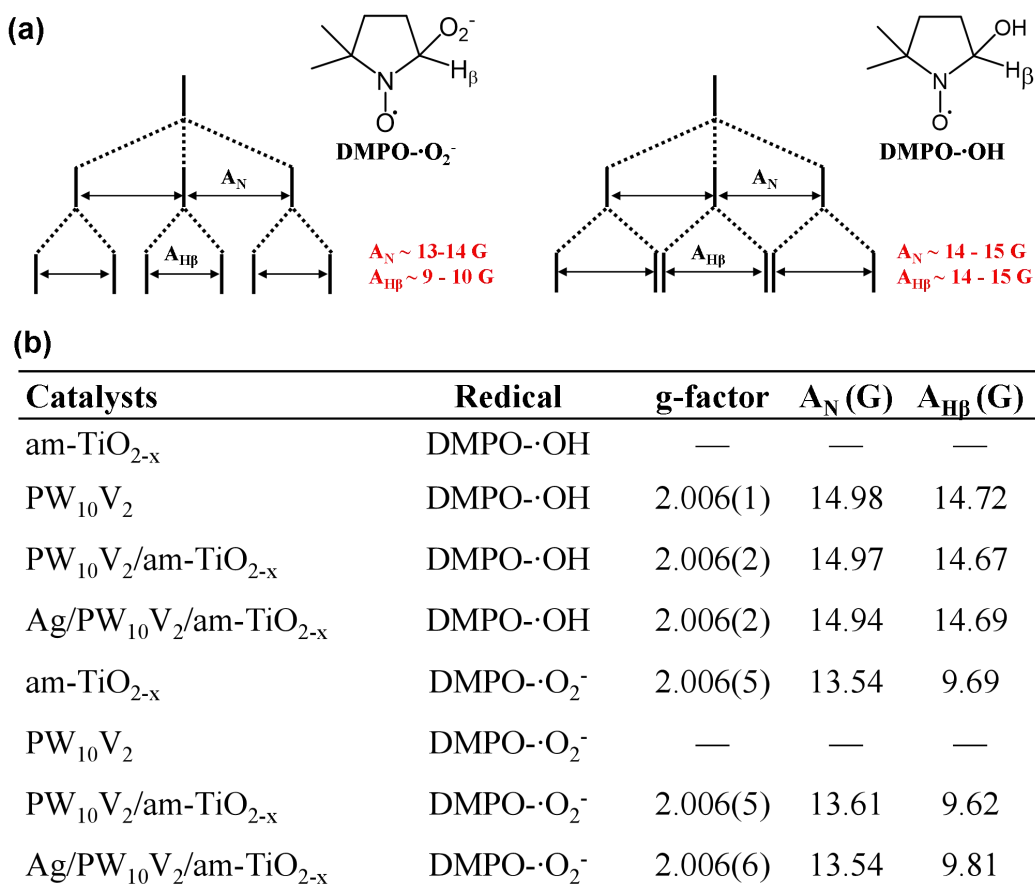

**Fig. S23.** (a) Schematic diagram of the EPR hyperfine splitting for DMPO·OH and DMPO·O<sub>2</sub><sup>-</sup> adducts, as well as (b) corresponding g-factors,  $A_N$ (G) and  $A_{\text{HB}}$ (G) values

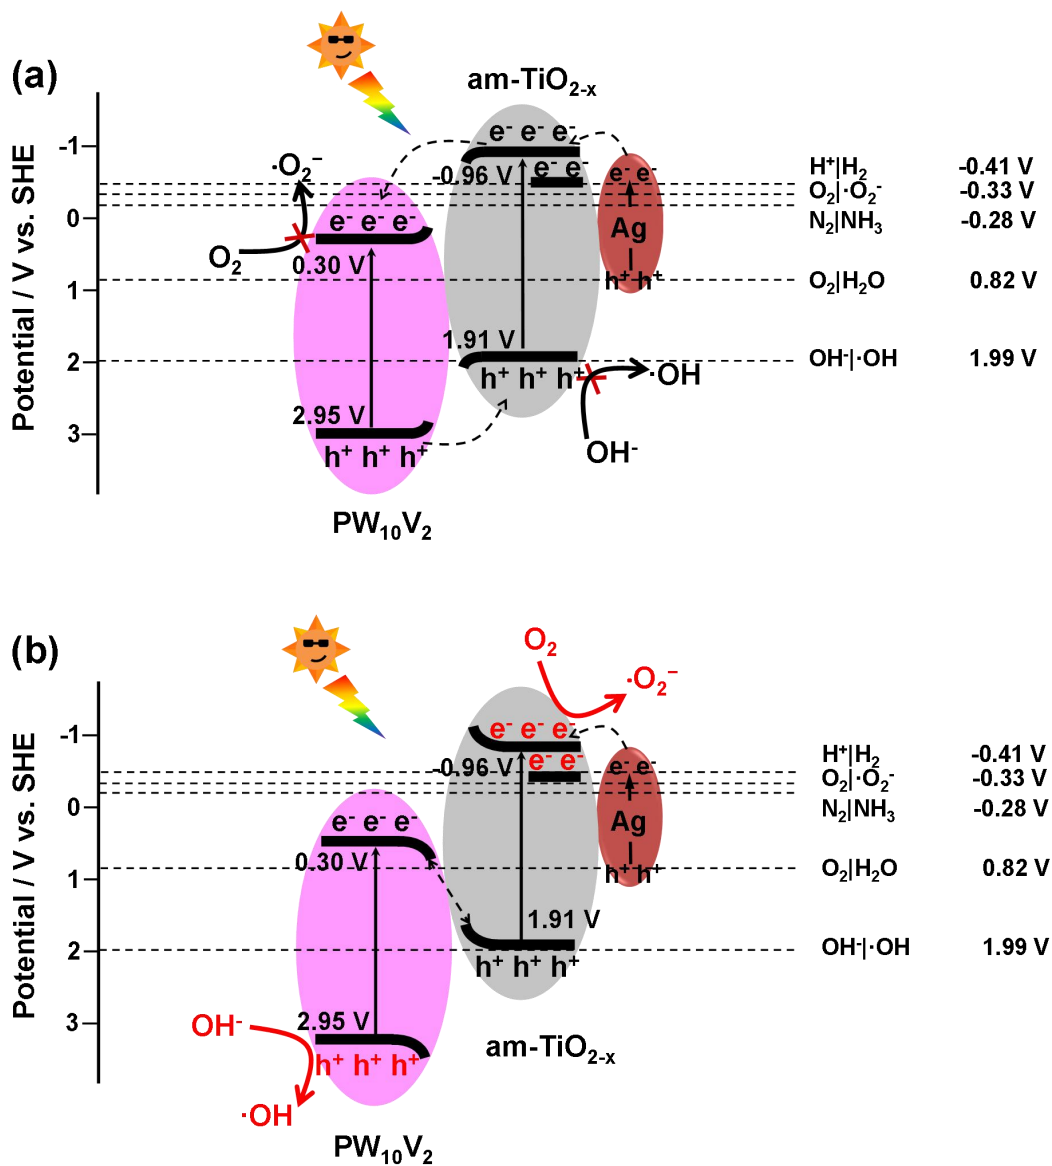

**Scheme S1.** Two different types of charge carrier separation and migration mechanism of the Ag/PW<sub>10</sub>V<sub>2</sub>/am-TiO<sub>2-x</sub> heterojunctions



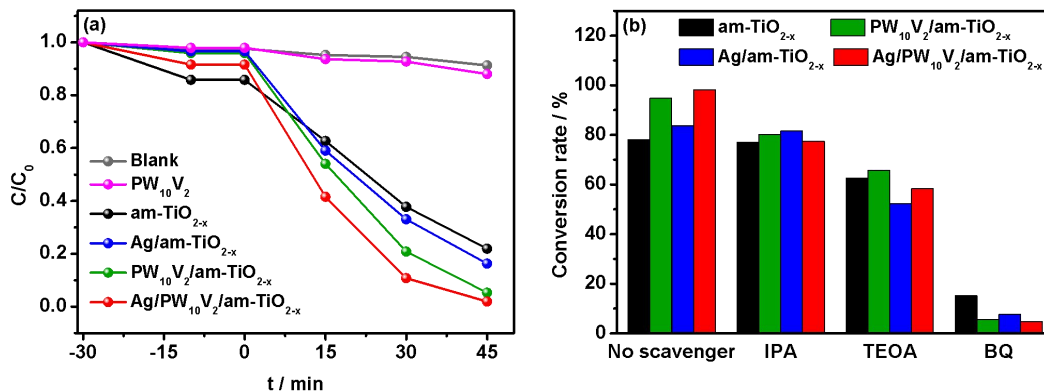

**Fig. S24.** (a) The photocatalytic activities of as-prepared catalysts for MO degradation under simulated sunlight and (b) corresponding trapping experiments for active species

To further verify the proposed mechanism in the  $\text{Ag/PW}_{10}\text{V}_2/\text{am-TiO}_{2-x}$  photocatalytic system, the photocatalytic activities of as-prepared catalysts are evaluated in degradation of MO. As shown in Fig. S24a,  $\text{PW}_{10}\text{V}_2/\text{am-TiO}_{2-x}$  still exhibits remarkably higher activity than those of neat  $\text{PW}_{10}\text{V}_2$  and  $\text{am-TiO}_{2-x}$ . Then, trapping experiments for active species are carried out to investigate the enhancing mechanism of photocatalytic system (Fig. S24b), where isopropanol (IPA), triethanolamine (TEOA) and 1,4-benzoquinone (BQ) are used as trapping agent for  $\cdot\text{OH}$ , photo-generated holes and  $\cdot\text{O}_2^-$ , respectively. For neat  $\text{am-TiO}_{2-x}$ , when introducing IPA into reaction solution, the photocatalytic degradation rate stays invariably, whereas slight decrease is observed when the TEOA is added into reaction solution. In contrast, the degradation is almost inhibited when BQ is introduced into the reaction medium. This means that  $\cdot\text{O}_2^-$  and holes are the major reactive species in the catalytic system of neat  $\text{am-TiO}_{2-x}$ . For  $\text{PW}_{10}\text{V}_2/\text{am-TiO}_{2-x}$ , the photocatalytic degradation rate decreases by ca. 15% and 30% when the IPA and TEOA were added into reaction solution, respectively; whereas it decreases significantly when BQ were added. Similar phenomenon occurs as well in the catalytic system of  $\text{Ag/PW}_{10}\text{V}_2/\text{am-TiO}_{2-x}$ . This phenomenon indicates that  $\cdot\text{OH}$ , holes and  $\cdot\text{O}_2^-$  all participate in the reaction, they are all the major reactive species in the catalytic system of  $\text{PW}_{10}\text{V}_2/\text{am-TiO}_{2-x}$  and  $\text{Ag/PW}_{10}\text{V}_2/\text{am-TiO}_{2-x}$ . The presence

of  $\cdot\text{O}_2^-$  in am-TiO<sub>2-x</sub> system was confirmed by EPR trapping experiments; as well the presence of  $\cdot\text{O}_2^-$  and  $\cdot\text{OH}$  in PW<sub>10</sub>V<sub>2</sub>/am-TiO<sub>2-x</sub> and Ag/PW<sub>10</sub>V<sub>2</sub>/am-TiO<sub>2-x</sub> systems (Fig. 5d and e in main text).

On the basis of the above experimental results, a photocatalytic mechanism for the enhanced activity of Ag/PW<sub>10</sub>V<sub>2</sub>/am-TiO<sub>2-x</sub> heterojunction was proposed (Scheme S1b). If the heterojunction between PW<sub>10</sub>V<sub>2</sub> and am-TiO<sub>2-x</sub> fits type-II mechanism (Scheme S1a),  $\cdot\text{O}_2^-$  cannot be generated from the accumulated photogenerated electrons on the LUMO orbital of PW<sub>10</sub>V<sub>2</sub>, and  $\cdot\text{OH}$  cannot be generated on the VB of am-TiO<sub>2-x</sub>. Thus, Z-scheme mechanism is suggested (Scheme S1b). In this way, the more photogenerated holes accumulated at HOMO of PW<sub>10</sub>V<sub>2</sub> can oxidize OH<sup>-</sup> to form more  $\cdot\text{OH}$ , the more photogenerated electrons accumulated in the CB of am-TiO<sub>2-x</sub> can reduce the adsorbed O<sub>2</sub> to form more  $\cdot\text{O}_2^-$ , which are powerful species that can break down the chromophores of organic pollutants into small molecules. Meanwhile, the photogenerated holes left behind in the HOMO of PW<sub>10</sub>V<sub>2</sub> can directly oxidize organic pollutants.

**Table S4.** Decay time of am-TiO<sub>2-x</sub>, PW<sub>10</sub>V<sub>2</sub>, PW<sub>10</sub>V<sub>2</sub>/am-TiO<sub>2-x</sub>, Ag/am-TiO<sub>2-x</sub> and Ag/PW<sub>10</sub>V<sub>2</sub>/am-TiO<sub>2-x</sub> derived from time-resolved PL curves

| Samples                                                   | $\tau_1$ (ns) /Int. (%) | $\tau_2$ (ns) /Int. (%) | $\tau_{av}$ (ns) |
|-----------------------------------------------------------|-------------------------|-------------------------|------------------|
| PW <sub>10</sub> V <sub>2</sub>                           | 1.14/60.94              | 6.73/39.06              | 5.56             |
| am-TiO <sub>2-x</sub>                                     | 1.08/59.47              | 5.81/40.53              | 4.79             |
| Ag/am-TiO <sub>2-x</sub>                                  | 1.27/50.31              | 9.81/49.69              | 8.82             |
| PW <sub>10</sub> V <sub>2</sub> /am-TiO <sub>2-x</sub>    | 0.97/50.30              | 7.60/49.70              | 6.84             |
| PW <sub>10</sub> V <sub>2</sub> /Ag/am-TiO <sub>2-x</sub> | 1.22/50.88              | 14.22/49.12             | 13.15            |

**Note:** A two-exponential function equation is used to fit the decay time. Fast decay component ( $\tau_1$  and  $A_1$ ) and slow component ( $\tau_2$  and  $A_2$ ) are obtained, deriving from the free excited states and the bound excited states, respectively. The average decay time is calculated according to equation  $\tau_{av} = (A_1 \cdot \tau_1^2 + A_2 \cdot \tau_2^2) / (A_1 \cdot \tau_1 + A_2 \cdot \tau_2)$ , where  $\tau$  and  $A$  are decay time and the relative intensity, respectively.

**Table S5.** Transient photocurrent intensity of PW<sub>10</sub>V<sub>2</sub>, am-TiO<sub>2-x</sub>, PW<sub>10</sub>V<sub>2</sub>/am-TiO<sub>2-x</sub>, Ag/am-TiO<sub>2-x</sub> and Ag/PW<sub>10</sub>V<sub>2</sub>/am-TiO<sub>2-x</sub>

| Samples                                                   | I <sub>1</sub> ( $\mu$ A) | I <sub>2</sub> ( $\mu$ A) | I <sub>3</sub> ( $\mu$ A) | I <sub>4</sub> ( $\mu$ A) | I <sub>5</sub> ( $\mu$ A) | I <sub>av</sub> ( $\mu$ A) |
|-----------------------------------------------------------|---------------------------|---------------------------|---------------------------|---------------------------|---------------------------|----------------------------|
| PW <sub>10</sub> V <sub>2</sub>                           | 0.29                      | 0.29                      | 0.29                      | 0.28                      | 0.28                      | 0.29                       |
| am-TiO <sub>2-x</sub>                                     | 0.24                      | 0.25                      | 0.24                      | 0.25                      | 0.24                      | 0.24                       |
| PW <sub>10</sub> V <sub>2</sub> /am-TiO <sub>2-x</sub>    | 0.33                      | 0.34                      | 0.34                      | 0.34                      | 0.33                      | 0.34                       |
| Ag/am-TiO <sub>2-x</sub>                                  | 0.41                      | 0.43                      | 0.42                      | 0.42                      | 0.42                      | 0.42                       |
| Ag/PW <sub>10</sub> V <sub>2</sub> /am-TiO <sub>2-x</sub> | 0.61                      | 0.62                      | 0.62                      | 0.62                      | 0.62                      | 0.62                       |

**Table S6.** The resistance of am-TiO<sub>2-x</sub>, PW<sub>10</sub>V<sub>2</sub>, PW<sub>10</sub>V<sub>2</sub>/am-TiO<sub>2-x</sub>, Ag/am-TiO<sub>2-x</sub> and Ag/PW<sub>10</sub>V<sub>2</sub>/am-TiO<sub>2-x</sub> obtained by EIS Nyquist plots

| Samples                                                   | R <sub>c</sub> (Ω) | R <sub>ct</sub> (Ω) |
|-----------------------------------------------------------|--------------------|---------------------|
| PW <sub>10</sub> V <sub>2</sub>                           | 63.34              | 28.32               |
| am-TiO <sub>2-x</sub>                                     | 64.92              | 29.07               |
| PW <sub>10</sub> V <sub>2</sub> /am-TiO <sub>2-x</sub>    | 74.39              | 26.21               |
| Ag/am-TiO <sub>2-x</sub>                                  | 50.99              | 23.89               |
| Ag/PW <sub>10</sub> V <sub>2</sub> /am-TiO <sub>2-x</sub> | 60.07              | 22.44               |

### 3. References

- 1 X. Gao, Y. Wen, D. Qu, L. An, S. Luan, W. Jiang, X. Zong, X. Liu and Z. Sun, *ACS Sustainable Chem. Eng.*, 2018, **6**, 5342-5348.
- 2 S. Sun, P. Song, J. Cui and S. Liang, *Catal. Sci. Technol.*, 2019, **9**, 4198-4215.
- 3 S. Tang, W. Wu, Z. Fu, S. Zou, Y. Liu, H. Zhao, S.R. Kirk and D. Yin, *ChemCatChem*, 2015, **7**, 2637-2645.
- 4 H. Shi, Y. Yu, Y. Zhang, X. Feng, X. Zhao, H. Tan, S.U. Khan, Y. Li and E. Wang, *Appl. Catal., B*, 2018, **221**, 280-289.
- 5 Y. Zhao, Y. Zhao, G.I.N. Waterhouse, L. Zheng, X. Cao, F. Teng, L.Z. Wu, C.H. Tung, D. O'Hare and T. Zhang, *Adv. Mater.*, 2017, **29**, 1703828.
- 6 S. Sun, X. Li, W. Wang, L. Zhang and X. Sun, *Appl. Catal., B*, 2017, **200**, 323-329.
- 7 X. Li, W. Wang, D. Jiang, S. Sun, L. Zhang and X. Sun, *Chem. - Eur. J.*, 2016, **22**, 13819-13822.
- 8 P. Li, Z. Zhou, Q. Wang, M. Guo, S. Chen, J. Low, R. Long, W. Liu, P. Ding, Y. Wu and Y. Xiong, *J. Am. Chem. Soc.*, 2020, **142**, 12430-12439.
- 9 S. Wang, X. Hai, X. Ding, K. Chang, Y. Xiang, X. Meng, Z. Yang, H. Chen and J. Ye, *Adv. Mater.*, 2017, **29**, 1701774.
- 10 Y. Lu, Y. Yang, T. Zhang, Z. Ge, H. Chang, P. Xiao, Y. Xie, L. Hua, Q. Li, H. Li, B. Ma, N. Guan, Y. Ma and Y. Chen, *ACS Nano*, 2016, **10**, 10507-10515.
- 11 C. Xiao, L. Zhang, K. Wang, H. Wang, Y. Zhou and W. Wang, *Appl. Catal., B*, 2018, **239**, 260-267.
- 12 N. Zhang, A. Jalil, D. Wu, S. Chen, Y. Liu, C. Gao, W. Ye, Z. Qi, H. Ju, C. Wang, X. Wu, L. Song, J. Zhu and Y. Xiong, *J. Am. Chem. Soc.*, 2018, **140**, 9434-9443.

- 13 X. Xue, R. Chen, C. Yan, Y. Hu, W. Zhang, S. Yang, L. Ma, G. Zhu and Z. Jin, *Nanoscale*, 2019, **11**, 10439-10445.
- 14 J. Liu, R. Li, X. Zu, X. Zhang, Y. Wang, Y. Wang and C. Fan, *Chem. Eng. J.*, 2019, **371**, 796-803.
- 15 X. Gao, Y. Shang, L. Liu and F. Fu, *J. Catal.*, 2019, **371**, 71-80.
- 16 S. Wu, X. Tan, K. Liu, J. Lei, L. Wang and J. Zhang, *Catal. Today*, 2019, **335**, 214-220.
- 17 Y. Li, X. Chen, M. Zhang, Y. Zhu, W. Ren, Z. Mei, M. Gu and F. Pan, *Catal. Sci. Technol.*, 2019, **9**, 803-810.
- 18 Y. Hao, X. Dong, S. Zhai, H. Ma, X. Wang and X. Zhang, *Chem. - Eur. J.*, 2016, **22**, 18722-18728.
- 19 H. Li, J. Shang, Z. Ai and L. Zhang, *J. Am. Chem. Soc.*, 2015, **137**, 6393-6399.
- 20 L. Ye, C. Han, Z. Ma, Y. Leng, J. Li, X. Ji, D. Bi, H. Xie and Z. Huang, *Chem. Eng. J.*, 2017, **307**, 311-318.
- 21 X. Gao, Y. Shang, L. Liu and F. Fu, *J. Colloid Interface Sci.*, 2019, **533**, 649-657.
- 22 A.M. Khenkin, P. Carl, D. Baute, A.M. Raitsimring, A.V. Astashkin, L.J.W. Shimon, D. Goldfarb and R. Neumann, *Inorg. Chim. Acta*, 2006, **359**, 3072-3078.
- 23 L. Xu, X. Ma, N. Sun and F. Chen, *Appl. Surf. Sci.*, 2018, **441**, 150-155.
- 24 X.Y. Kong, W.Q. Lee, A.R. Mohamed and S.-P. Chai, *Chem. Eng. J.*, 2019, **372**, 1183-1193.
- 25 J. Meng, X. Wang, X. Yang, A. Hu, Y. Guo and Y. Yang, *Appl. Catal., B*, 2019, **251**, 168-180.
